# Supplementary material for: Avian leukosis virus subgroup J infection influences the gut microbiota composition in chicken
Source: Research Square preprint supplement (doi:10.21203/rs.3.rs-16010/v3), 2020-12-11
Supplement: Supplementary file 1 [file df7fdd97aeb50e698f416d2b.xlsx]

## Sheet: Sheet1
Taxon	A1	A2	A3	A4	B1	B2	B3	B4
Unclassified;Other	0.000284172	0	5.68343e-05	0.000625178	0.00824098	0.108213	0.00431941	0.0161978
k__Archaea;Other	0	0	0	0	5.68343e-05	5.68343e-05	0	0
k__Archaea;p__Crenarchaeota	0.000170503	5.68343e-05	0	0	0.000113669	5.68343e-05	0	0
k__Archaea;p__Euryarchaeota	0.00039784	0.000170503	0.000568343	5.68343e-05	0.000113669	0.000284172	0.000170503	0.000113669
k__Archaea;p__[Parvarchaeota]	5.68343e-05	0	0	0	0.000113669	0.000454675	0.000113669	0
k__Bacteria;Other	0.000284172	0.000113669	0.000227337	0.000284172	0.00437624	0.0592782	0.00204604	0.0108554
k__Bacteria;p__Acidobacteria	0	5.68343e-05	0	0	0.000113669	0.00159136	5.68343e-05	0
k__Bacteria;p__Actinobacteria	0.00414891	0.000682012	0.000966184	0.000966184	0.00221654	0.0204035	0.00238704	0.00233021
k__Bacteria;p__Armatimonadetes	0.000113669	0	0	0	0	5.68343e-05	0	0
k__Bacteria;p__BRC1	0	0	0	0	0	0	0	0
k__Bacteria;p__Bacteroidetes	0.00591077	0.00107985	0.00261438	0.00119352	0.00642228	0.0410912	0.00318272	0.00772947
k__Bacteria;p__Caldithrix	0	0	0	0	0	0	0	0
k__Bacteria;p__Chlorobi	0	0	0	0	0	5.68343e-05	0	0
k__Bacteria;p__Chloroflexi	0.000227337	0.000170503	0.00039784	0.000113669	0	0.00568343	0.000284172	0.000284172
k__Bacteria;p__Cyanobacteria	0.00426257	0.000568343	0.00295539	0.00386473	0.0128446	0.00687695	0.00210287	0.00238704
k__Bacteria;p__Deferribacteres	5.68343e-05	0	0.000113669	0	0	5.68343e-05	0	0
k__Bacteria;p__Elusimicrobia	0	0	0	0	0	0	0	0
k__Bacteria;p__FBP	0	0	0	0	0	0	0	0
k__Bacteria;p__Firmicutes	0.961523	0.993748	0.982722	0.983291	0.735493	0.134811	0.842683	0.38744
k__Bacteria;p__Fusobacteria	0	0	0.000170503	0	0.000284172	0.00210287	0	0.000682012
k__Bacteria;p__GN02	0	0	0	0	0	5.68343e-05	0	0
k__Bacteria;p__Gemmatimonadetes	5.68343e-05	5.68343e-05	5.68343e-05	0	0	0.000227337	0	0
k__Bacteria;p__KSB3	0	0	0	0	0	0	0	0
k__Bacteria;p__Lentisphaerae	0	5.68343e-05	5.68343e-05	5.68343e-05	0	0.000113669	5.68343e-05	5.68343e-05
k__Bacteria;p__NKB19	0	0	0	5.68343e-05	0	0.000113669	0	0
k__Bacteria;p__Nitrospirae	0	0	0	0	0	0	0	0
k__Bacteria;p__OD1	0	0	0	0	0	0.000227337	0	0
k__Bacteria;p__OP3	0	0	0	0	0	0	0	0
k__Bacteria;p__Planctomycetes	5.68343e-05	0	5.68343e-05	0.00039784	0.000170503	0.00608127	0	0
k__Bacteria;p__Proteobacteria	0.021597	0.00250071	0.00807047	0.00903666	0.22819	0.608866	0.139812	0.571128
k__Bacteria;p__SBR1093	0.000113669	5.68343e-05	0.000113669	0	5.68343e-05	0.00153453	0.000113669	0
k__Bacteria;p__Spirochaetes	0	5.68343e-05	5.68343e-05	0	0.000454675	5.68343e-05	0	0
k__Bacteria;p__Synergistetes	0.000284172	0.000113669	0.000227337	0	0	0	0.000170503	0.000170503
k__Bacteria;p__TM6	0	0	0	0	0	0.000454675	0	0
k__Bacteria;p__TM7	0	0	5.68343e-05	0	0	0	0	0
k__Bacteria;p__Tenericutes	0.000341006	0.000170503	0.000284172	5.68343e-05	0.000170503	0	0.00238704	0.000170503
k__Bacteria;p__Verrucomicrobia	0	0.000284172	0.000170503	0	0	0.000170503	0.000113669	0.000284172
k__Bacteria;p__WPS-2	0	5.68343e-05	0	0	0	0	0	0
k__Bacteria;p__WS2	0	0	0	0	0	5.68343e-05	0	0
k__Bacteria;p__WS3	0	0	0	0	0	0.000113669	0	0
k__Bacteria;p__[Thermi]	0.000113669	0	5.68343e-05	0	0.000568343	0.000852515	0	0.000170503
