# Supplementary material for: Avian leukosis virus subgroup J infection influences the gut microbiota composition in chicken
Source: Research Square preprint supplement (doi:10.21203/rs.3.rs-16010/v3), 2020-12-11
Supplement: Supplementary file 2 [file f54cf366f5ec8f3b2942daea.xlsx]

## Sheet: Sheet1
Taxon	A1	A2	A3	A4	B1	B2	B3	B4
Unclassified;Other;Other;Other;Other;Other	0.000284172	0	5.68343e-05	0.000625178	0.00824098	0.108213	0.00431941	0.0161978
k__Archaea;Other;Other;Other;Other;Other	0	0	0	0	5.68343e-05	5.68343e-05	0	0
k__Archaea;p__Crenarchaeota;c__MCG;o__;f__;g__	0	0	0	0	0	5.68343e-05	0	0
k__Archaea;p__Crenarchaeota;c__Thaumarchaeota;Other;Other;Other	5.68343e-05	0	0	0	0	0	0	0
k__Archaea;p__Crenarchaeota;c__Thaumarchaeota;o__Cenarchaeales;f__Cenarchaeaceae;g__	5.68343e-05	0	0	0	0	0	0	0
k__Archaea;p__Crenarchaeota;c__Thaumarchaeota;o__Cenarchaeales;f__Cenarchaeaceae;g__Cenarchaeum	0	0	0	0	0	0	0	0
k__Archaea;p__Crenarchaeota;c__Thaumarchaeota;o__Cenarchaeales;f__Cenarchaeaceae;g__Nitrosopumilus	5.68343e-05	5.68343e-05	0	0	0	0	0	0
k__Archaea;p__Crenarchaeota;c__Thaumarchaeota;o__Nitrososphaerales;f__Nitrososphaeraceae;g__Candidatus Nitrososphaera	0	0	0	0	0.000113669	0	0	0
k__Archaea;p__Euryarchaeota;c__Halobacteria;o__Halobacteriales;f__Halobacteriaceae;g__Halalkalicoccus	0	0	0	0	0	0.000227337	0	0
k__Archaea;p__Euryarchaeota;c__Methanobacteria;o__Methanobacteriales;f__Methanobacteriaceae;g__Methanobrevibacter	0.00039784	0.000170503	0.000568343	5.68343e-05	0.000113669	5.68343e-05	0.000170503	0.000113669
k__Archaea;p__Euryarchaeota;c__Methanomicrobia;o__Methanomicrobiales;f__Methanocorpusculaceae;g__	0	0	0	0	0	0	0	0
k__Archaea;p__[Parvarchaeota];c__[Parvarchaea];o__WCHD3-30;f__;g__	5.68343e-05	0	0	0	0.000113669	0.000454675	5.68343e-05	0
k__Archaea;p__[Parvarchaeota];c__[Parvarchaea];o__YLA114;f__;g__	0	0	0	0	0	0	5.68343e-05	0
k__Bacteria;Other;Other;Other;Other;Other	0.000284172	0.000113669	0.000227337	0.000284172	0.00437624	0.0592782	0.00204604	0.0108554
k__Bacteria;p__Acidobacteria;Other;Other;Other;Other	0	0	0	0	0	5.68343e-05	0	0
k__Bacteria;p__Acidobacteria;c__;o__;f__;g__	0	0	0	0	0	0	0	0
k__Bacteria;p__Acidobacteria;c__AT-s2-57;o__;f__;g__	0	0	0	0	0	0	0	0
k__Bacteria;p__Acidobacteria;c__AT-s54;o__;f__;g__	0	0	0	0	5.68343e-05	0	0	0
k__Bacteria;p__Acidobacteria;c__Acidobacteria-6;o__;f__;g__	0	0	0	0	0	5.68343e-05	0	0
k__Bacteria;p__Acidobacteria;c__Acidobacteria-6;o__iii1-15;f__;g__	0	0	0	0	0	0.000113669	0	0
k__Bacteria;p__Acidobacteria;c__Acidobacteria-6;o__iii1-15;f__mb2424;g__	0	0	0	0	0	0.000113669	0	0
k__Bacteria;p__Acidobacteria;c__Acidobacteriia;o__Acidobacteriales;f__Koribacteraceae;g__Candidatus Koribacter	0	0	0	0	0	0.000170503	0	0
k__Bacteria;p__Acidobacteria;c__Holophagae;o__Holophagales;f__;g__	0	0	0	0	0	0	0	0
k__Bacteria;p__Acidobacteria;c__OS-K;o__;f__;g__	0	0	0	0	0	0	0	0
k__Bacteria;p__Acidobacteria;c__RB25;o__;f__;g__	0	0	0	0	0	0.000113669	0	0
k__Bacteria;p__Acidobacteria;c__Sva0725;o__Sva0725;f__;g__	0	0	0	0	5.68343e-05	0.000795681	5.68343e-05	0
k__Bacteria;p__Acidobacteria;c__[Chloracidobacteria];o__RB41;f__Ellin6075;g__	0	0	0	0	0	0	0	0
k__Bacteria;p__Acidobacteria;c__iii1-8;o__DS-18;f__;g__	0	5.68343e-05	0	0	0	0.000170503	0	0
k__Bacteria;p__Actinobacteria;Other;Other;Other;Other	0	0	0	0	0	0	0	0
k__Bacteria;p__Actinobacteria;c__Acidimicrobiia;o__Acidimicrobiales;Other;Other	0	0	0	0	0	5.68343e-05	0	0
k__Bacteria;p__Actinobacteria;c__Acidimicrobiia;o__Acidimicrobiales;f__;g__	0	0	0	0	0	5.68343e-05	0	0
k__Bacteria;p__Actinobacteria;c__Acidimicrobiia;o__Acidimicrobiales;f__C111;g__	5.68343e-05	0	0	0	5.68343e-05	5.68343e-05	0	5.68343e-05
k__Bacteria;p__Actinobacteria;c__Acidimicrobiia;o__Acidimicrobiales;f__JdFBGBact;g__	0	0	0	0	0	5.68343e-05	5.68343e-05	0
k__Bacteria;p__Actinobacteria;c__Acidimicrobiia;o__Acidimicrobiales;f__Microthrixaceae;g__	0	0	0	0	0	5.68343e-05	0	0
k__Bacteria;p__Actinobacteria;c__Acidimicrobiia;o__Acidimicrobiales;f__koll13;g__	0	5.68343e-05	0	5.68343e-05	5.68343e-05	0.000625178	0.000170503	5.68343e-05
k__Bacteria;p__Actinobacteria;c__Acidimicrobiia;o__Acidimicrobiales;f__koll13;g__mixed	0	0	0	5.68343e-05	0	5.68343e-05	5.68343e-05	0
k__Bacteria;p__Actinobacteria;c__Acidimicrobiia;o__Acidimicrobiales;f__ntu14;g__	0	0	0	0	0	0	0	0
k__Bacteria;p__Actinobacteria;c__Acidimicrobiia;o__Acidimicrobiales;f__wb1_P06;g__	0	0	0	0	0	0	0	0
k__Bacteria;p__Actinobacteria;c__Actinobacteria;o__Actinomycetales;Other;Other	0.000113669	0	0	0	0	0.000113669	0	5.68343e-05
k__Bacteria;p__Actinobacteria;c__Actinobacteria;o__Actinomycetales;f__;g__	0	0	0	0	0	0	0	5.68343e-05
k__Bacteria;p__Actinobacteria;c__Actinobacteria;o__Actinomycetales;f__Actinomycetaceae;g__	0.000682012	0	0	0	0	0	0	0
k__Bacteria;p__Actinobacteria;c__Actinobacteria;o__Actinomycetales;f__Actinomycetaceae;g__Actinomyces	0.000909349	5.68343e-05	0	0	0	0.000113669	0	0
k__Bacteria;p__Actinobacteria;c__Actinobacteria;o__Actinomycetales;f__Brevibacteriaceae;g__Brevibacterium	0.000284172	5.68343e-05	5.68343e-05	0.000227337	0.000113669	0.00170503	0.00039784	5.68343e-05
k__Bacteria;p__Actinobacteria;c__Actinobacteria;o__Actinomycetales;f__Corynebacteriaceae;g__Corynebacterium	0.000738846	0.000170503	0.000284172	5.68343e-05	0.000454675	0.00539926	0.000682012	0.00102302
k__Bacteria;p__Actinobacteria;c__Actinobacteria;o__Actinomycetales;f__Dermabacteraceae;g__	0	0	0	0	0	0	0	0
k__Bacteria;p__Actinobacteria;c__Actinobacteria;o__Actinomycetales;f__Dermabacteraceae;g__Brachybacterium	5.68343e-05	0	0	5.68343e-05	0.000170503	0.000284172	0	0
k__Bacteria;p__Actinobacteria;c__Actinobacteria;o__Actinomycetales;f__Dermacoccaceae;g__Dermacoccus	5.68343e-05	0	5.68343e-05	0	0	0.00102302	0	0
k__Bacteria;p__Actinobacteria;c__Actinobacteria;o__Actinomycetales;f__Dietziaceae;g__Dietzia	0	0	0	0	0	0	0	0
k__Bacteria;p__Actinobacteria;c__Actinobacteria;o__Actinomycetales;f__Geodermatophilaceae;g__	0	0	0	0	0	0	0	0
k__Bacteria;p__Actinobacteria;c__Actinobacteria;o__Actinomycetales;f__Geodermatophilaceae;g__Blastococcus	0	0	0	0	0	0	0	0
k__Bacteria;p__Actinobacteria;c__Actinobacteria;o__Actinomycetales;f__Gordoniaceae;g__Gordonia	0	0	0	0	0	0.000170503	0	0
k__Bacteria;p__Actinobacteria;c__Actinobacteria;o__Actinomycetales;f__Intrasporangiaceae;g__Intrasporangium	0	0	0	0	0	5.68343e-05	0	0
k__Bacteria;p__Actinobacteria;c__Actinobacteria;o__Actinomycetales;f__Intrasporangiaceae;g__Janibacter	0	0	0	0	0.000511509	0.00039784	0	0.000170503
k__Bacteria;p__Actinobacteria;c__Actinobacteria;o__Actinomycetales;f__Kineosporiaceae;g__	0	0	0	0	5.68343e-05	0	0	0
k__Bacteria;p__Actinobacteria;c__Actinobacteria;o__Actinomycetales;f__Microbacteriaceae;g__	0.000113669	0	5.68343e-05	0.000170503	5.68343e-05	5.68343e-05	0.000113669	0
k__Bacteria;p__Actinobacteria;c__Actinobacteria;o__Actinomycetales;f__Microbacteriaceae;g__Candidatus Aquiluna	5.68343e-05	0.000113669	5.68343e-05	0.000170503	0	0.000227337	0.000170503	0
k__Bacteria;p__Actinobacteria;c__Actinobacteria;o__Actinomycetales;f__Microbacteriaceae;g__Microbacterium	0.000113669	0	0	0	0	0.000625178	5.68343e-05	5.68343e-05
k__Bacteria;p__Actinobacteria;c__Actinobacteria;o__Actinomycetales;f__Microbacteriaceae;g__Pseudoclavibacter	0	0	0	0	0.000113669	0.000454675	0	0
k__Bacteria;p__Actinobacteria;c__Actinobacteria;o__Actinomycetales;f__Micrococcaceae;Other	0.000227337	0	0	0	0	5.68343e-05	0.000170503	0
k__Bacteria;p__Actinobacteria;c__Actinobacteria;o__Actinomycetales;f__Micrococcaceae;g__Arthrobacter	0	0	0	0	0	0	0	5.68343e-05
k__Bacteria;p__Actinobacteria;c__Actinobacteria;o__Actinomycetales;f__Micrococcaceae;g__Kocuria	0	0	0	0	0	5.68343e-05	0	0
k__Bacteria;p__Actinobacteria;c__Actinobacteria;o__Actinomycetales;f__Micrococcaceae;g__Micrococcus	5.68343e-05	0	0	5.68343e-05	0.000113669	0.00159136	0	0.000113669
k__Bacteria;p__Actinobacteria;c__Actinobacteria;o__Actinomycetales;f__Micrococcaceae;g__Nesterenkonia	0	0	0	0	0	0.000227337	0	5.68343e-05
k__Bacteria;p__Actinobacteria;c__Actinobacteria;o__Actinomycetales;f__Micrococcaceae;g__Rothia	0	0	5.68343e-05	0.000113669	0	0	0	0
k__Bacteria;p__Actinobacteria;c__Actinobacteria;o__Actinomycetales;f__Micromonosporaceae;g__Actinoplanes	0	0	0	0	0	0	5.68343e-05	0
k__Bacteria;p__Actinobacteria;c__Actinobacteria;o__Actinomycetales;f__Mycobacteriaceae;g__Mycobacterium	0	0	0	0	0	5.68343e-05	0	0
k__Bacteria;p__Actinobacteria;c__Actinobacteria;o__Actinomycetales;f__Nocardiaceae;g__Rhodococcus	5.68343e-05	0	0	0	0	0	0	0
k__Bacteria;p__Actinobacteria;c__Actinobacteria;o__Actinomycetales;f__Nocardioidaceae;g__	0	0	0	0	0	0.000284172	0	0
k__Bacteria;p__Actinobacteria;c__Actinobacteria;o__Actinomycetales;f__Nocardioidaceae;g__Nocardioides	0	0	0	0	0	5.68343e-05	0	5.68343e-05
k__Bacteria;p__Actinobacteria;c__Actinobacteria;o__Actinomycetales;f__Promicromonosporaceae;g__	0	0	0	0	0	0	0	0
k__Bacteria;p__Actinobacteria;c__Actinobacteria;o__Actinomycetales;f__Promicromonosporaceae;g__Cellulosimicrobium	0	0	0	0	0	0	0	5.68343e-05
k__Bacteria;p__Actinobacteria;c__Actinobacteria;o__Actinomycetales;f__Propionibacteriaceae;Other	0	0	0	0	0	5.68343e-05	0	0
k__Bacteria;p__Actinobacteria;c__Actinobacteria;o__Actinomycetales;f__Propionibacteriaceae;g__Propionibacterium	0.000227337	0	0.000284172	0	0.00039784	0.00534243	0.000454675	0.000341006
k__Bacteria;p__Actinobacteria;c__Actinobacteria;o__Actinomycetales;f__Pseudonocardiaceae;g__Actinomycetospora	0	0	0	0	0	0.000625178	0	0
k__Bacteria;p__Actinobacteria;c__Actinobacteria;o__Actinomycetales;f__Pseudonocardiaceae;g__Pseudonocardia	5.68343e-05	0	0	0	0	5.68343e-05	0	0
k__Bacteria;p__Actinobacteria;c__Actinobacteria;o__Actinomycetales;f__Streptomycetaceae;g__Streptomyces	0	0	0	0	5.68343e-05	0	0	0
k__Bacteria;p__Actinobacteria;c__Actinobacteria;o__Bifidobacteriales;f__Bifidobacteriaceae;g__	0	0	0	0	0	5.68343e-05	0	0
k__Bacteria;p__Actinobacteria;c__Actinobacteria;o__Bifidobacteriales;f__Bifidobacteriaceae;g__Aeriscardovia	0.000284172	0.000227337	5.68343e-05	0	0	0	0	0.000113669
k__Bacteria;p__Actinobacteria;c__Coriobacteriia;o__Coriobacteriales;f__Coriobacteriaceae;g__	5.68343e-05	0	0	0	0	0	0	0
k__Bacteria;p__Actinobacteria;c__Coriobacteriia;o__Coriobacteriales;f__Coriobacteriaceae;g__Atopobium	0	0	0	0	0	0	0	0
k__Bacteria;p__Actinobacteria;c__Coriobacteriia;o__Coriobacteriales;f__Coriobacteriaceae;g__Collinsella	0	0	0	0	0	5.68343e-05	0	0
k__Bacteria;p__Actinobacteria;c__Coriobacteriia;o__Coriobacteriales;f__Coriobacteriaceae;g__Coriobacterium	0	0	0	0	0	0	0	0
k__Bacteria;p__Actinobacteria;c__Coriobacteriia;o__Coriobacteriales;f__Coriobacteriaceae;g__Slackia	0	0	5.68343e-05	0	0	0	0	0
k__Bacteria;p__Actinobacteria;c__Nitriliruptoria;o__Nitriliruptorales;f__Nitriliruptoraceae;g__	0	0	0	0	5.68343e-05	0	0	0
k__Bacteria;p__Actinobacteria;c__Nitriliruptoria;o__Nitriliruptorales;f__Nitriliruptoraceae;g__Nitriliruptor	0	0	0	0	0	0	0	0
k__Bacteria;p__Actinobacteria;c__OPB41;o__;f__;g__	0	0	0	0	0	0.000227337	0	0
k__Bacteria;p__Actinobacteria;c__Thermoleophilia;o__Gaiellales;f__;g__	0	0	0	0	0	5.68343e-05	0	0
k__Bacteria;p__Actinobacteria;c__Thermoleophilia;o__Solirubrobacterales;f__Conexibacteraceae;g__	0	0	0	0	0	0	0	0
k__Bacteria;p__Actinobacteria;c__Thermoleophilia;o__Solirubrobacterales;f__Patulibacteraceae;g__	0	0	0	0	0	0	0	0
k__Bacteria;p__Armatimonadetes;c__0319-6E2;o__;f__;g__	0.000113669	0	0	0	0	0	0	0
k__Bacteria;p__Armatimonadetes;c__Armatimonadia;o__Armatimonadales;f__Armatimonadaceae;g__	0	0	0	0	0	5.68343e-05	0	0
k__Bacteria;p__BRC1;c__NPL-UPA2;o__;f__;g__	0	0	0	0	0	0	0	0
k__Bacteria;p__BRC1;c__PRR-11;o__;f__;g__	0	0	0	0	0	0	0	0
k__Bacteria;p__Bacteroidetes;Other;Other;Other;Other	0	0	0	0	5.68343e-05	0.000170503	0	0
k__Bacteria;p__Bacteroidetes;c__BME43;o__;f__;g__	0	0	0	5.68343e-05	0	0	0	0
k__Bacteria;p__Bacteroidetes;c__Bacteroidia;o__Bacteroidales;Other;Other	5.68343e-05	5.68343e-05	0	0	0.000113669	0	0	5.68343e-05
k__Bacteria;p__Bacteroidetes;c__Bacteroidia;o__Bacteroidales;f__;g__	0	0	5.68343e-05	0	0.000113669	0.000284172	0	0
k__Bacteria;p__Bacteroidetes;c__Bacteroidia;o__Bacteroidales;f__Bacteroidaceae;g__	0	0	0	0	0	0	0	0
k__Bacteria;p__Bacteroidetes;c__Bacteroidia;o__Bacteroidales;f__Bacteroidaceae;g__Bacteroides	0.000341006	0	5.68343e-05	0	0.000113669	0.000682012	5.68343e-05	0.000227337
k__Bacteria;p__Bacteroidetes;c__Bacteroidia;o__Bacteroidales;f__Marinilabiaceae;g__	0	0	0	0	0	0	0	0
k__Bacteria;p__Bacteroidetes;c__Bacteroidia;o__Bacteroidales;f__Porphyromonadaceae;Other	0	0	0	0	0	0.000170503	5.68343e-05	5.68343e-05
k__Bacteria;p__Bacteroidetes;c__Bacteroidia;o__Bacteroidales;f__Porphyromonadaceae;g__Dysgonomonas	0	0	0	0	5.68343e-05	0	0.000113669	0.000170503
k__Bacteria;p__Bacteroidetes;c__Bacteroidia;o__Bacteroidales;f__Porphyromonadaceae;g__Paludibacter	0	0	5.68343e-05	0	0	0	0	0
k__Bacteria;p__Bacteroidetes;c__Bacteroidia;o__Bacteroidales;f__Porphyromonadaceae;g__Parabacteroides	0.000113669	0	5.68343e-05	0	0	0	0	0
k__Bacteria;p__Bacteroidetes;c__Bacteroidia;o__Bacteroidales;f__Porphyromonadaceae;g__Porphyromonas	0	0	0	0	0	5.68343e-05	0	0
k__Bacteria;p__Bacteroidetes;c__Bacteroidia;o__Bacteroidales;f__Porphyromonadaceae;g__Tannerella	0	0	0	0	0.000113669	0	0	0
k__Bacteria;p__Bacteroidetes;c__Bacteroidia;o__Bacteroidales;f__Prevotellaceae;g__Prevotella	0.000113669	5.68343e-05	0	0	0.000170503	0.000625178	0	0.000170503
k__Bacteria;p__Bacteroidetes;c__Bacteroidia;o__Bacteroidales;f__Rikenellaceae;Other	0	0	0	0	0	0	0	0
k__Bacteria;p__Bacteroidetes;c__Bacteroidia;o__Bacteroidales;f__Rikenellaceae;g__	5.68343e-05	0	5.68343e-05	0	5.68343e-05	0	5.68343e-05	0.000113669
k__Bacteria;p__Bacteroidetes;c__Bacteroidia;o__Bacteroidales;f__Rikenellaceae;g__AF12	0	0	5.68343e-05	0	0	0	0	0
k__Bacteria;p__Bacteroidetes;c__Bacteroidia;o__Bacteroidales;f__Rikenellaceae;g__Alistipes	0	5.68343e-05	0	0	0	0	0	5.68343e-05
k__Bacteria;p__Bacteroidetes;c__Bacteroidia;o__Bacteroidales;f__Rikenellaceae;g__PW3	5.68343e-05	0.000113669	0	0	5.68343e-05	0	0.000113669	0
k__Bacteria;p__Bacteroidetes;c__Bacteroidia;o__Bacteroidales;f__S24-7;g__	5.68343e-05	0	0	0	0	0	0	0
k__Bacteria;p__Bacteroidetes;c__Bacteroidia;o__Bacteroidales;f__VC21_Bac22;g__	0	0	0	0	0	0	0	0
k__Bacteria;p__Bacteroidetes;c__Bacteroidia;o__Bacteroidales;f__[Barnesiellaceae];g__	0	0	0	0	0	0	0	0
k__Bacteria;p__Bacteroidetes;c__Bacteroidia;o__Bacteroidales;f__[Barnesiellaceae];g__Barnesiella	0	0	0	0	0	0	0.000170503	0
k__Bacteria;p__Bacteroidetes;c__Bacteroidia;o__Bacteroidales;f__[Odoribacteraceae];g__Odoribacter	0	0	0	0	0	0.000625178	0	0
k__Bacteria;p__Bacteroidetes;c__Bacteroidia;o__Bacteroidales;f__[Paraprevotellaceae];g__	0	0	0	0	0	0	0	0
k__Bacteria;p__Bacteroidetes;c__Bacteroidia;o__Bacteroidales;f__[Paraprevotellaceae];g__[Prevotella]	0	0	0	0	0	0	0	0
k__Bacteria;p__Bacteroidetes;c__Bacteroidia;o__Bacteroidales;f__p-2534-18B5;g__	0	0	0	0	0	0	0	0
k__Bacteria;p__Bacteroidetes;c__Cytophagia;o__Cytophagales;f__;g__	0	0	0	0	0	0	0	0
k__Bacteria;p__Bacteroidetes;c__Cytophagia;o__Cytophagales;f__Cyclobacteriaceae;g__	0	0	0	0	0	0	0	0
k__Bacteria;p__Bacteroidetes;c__Cytophagia;o__Cytophagales;f__Cytophagaceae;Other	0	5.68343e-05	0	0	0	5.68343e-05	0	0
k__Bacteria;p__Bacteroidetes;c__Cytophagia;o__Cytophagales;f__Cytophagaceae;g__	0	0	0	0	5.68343e-05	0	0	5.68343e-05
k__Bacteria;p__Bacteroidetes;c__Cytophagia;o__Cytophagales;f__Cytophagaceae;g__Cytophaga	0	0	0	0	0	0	0	0
k__Bacteria;p__Bacteroidetes;c__Cytophagia;o__Cytophagales;f__Cytophagaceae;g__Flectobacillus	0	0	0	0	0	0.000113669	0	0
k__Bacteria;p__Bacteroidetes;c__Cytophagia;o__Cytophagales;f__Cytophagaceae;g__Hymenobacter	0.000568343	0	0	0	0	0.000113669	0	0
k__Bacteria;p__Bacteroidetes;c__Cytophagia;o__Cytophagales;f__Cytophagaceae;g__Leadbetterella	0	0	0	0	0	0	0	0
k__Bacteria;p__Bacteroidetes;c__Cytophagia;o__Cytophagales;f__Cytophagaceae;g__Runella	0	0	0	0	0	0	0	0
k__Bacteria;p__Bacteroidetes;c__Cytophagia;o__Cytophagales;f__Flammeovirgaceae;Other	0	0	0	5.68343e-05	0	0.000170503	0	0
k__Bacteria;p__Bacteroidetes;c__Cytophagia;o__Cytophagales;f__Flammeovirgaceae;g__	0	0	0	5.68343e-05	0	0.00130719	0	0
k__Bacteria;p__Bacteroidetes;c__Flavobacteriia;o__Flavobacteriales;Other;Other	5.68343e-05	0	0	0	0	0	0	0
k__Bacteria;p__Bacteroidetes;c__Flavobacteriia;o__Flavobacteriales;f__;g__	0	5.68343e-05	0	0.000170503	0	0.000170503	0	5.68343e-05
k__Bacteria;p__Bacteroidetes;c__Flavobacteriia;o__Flavobacteriales;f__Cryomorphaceae;Other	0	0	0	0	0	0	0	0
k__Bacteria;p__Bacteroidetes;c__Flavobacteriia;o__Flavobacteriales;f__Cryomorphaceae;g__	0.000227337	0	0	0.000113669	0.000113669	0.000170503	0	0.000113669
k__Bacteria;p__Bacteroidetes;c__Flavobacteriia;o__Flavobacteriales;f__Cryomorphaceae;g__Crocinitomix	0	5.68343e-05	5.68343e-05	5.68343e-05	5.68343e-05	0	0	0.000113669
k__Bacteria;p__Bacteroidetes;c__Flavobacteriia;o__Flavobacteriales;f__Cryomorphaceae;g__Fluviicola	5.68343e-05	0	0	0	0	0	0	0
k__Bacteria;p__Bacteroidetes;c__Flavobacteriia;o__Flavobacteriales;f__Flavobacteriaceae;Other	5.68343e-05	0	0	0	0.000113669	0.000341006	0	0.000113669
k__Bacteria;p__Bacteroidetes;c__Flavobacteriia;o__Flavobacteriales;f__Flavobacteriaceae;g__	0	5.68343e-05	0	5.68343e-05	0.000113669	0.00193237	0.000113669	0
k__Bacteria;p__Bacteroidetes;c__Flavobacteriia;o__Flavobacteriales;f__Flavobacteriaceae;g__Arenibacter	0	0	5.68343e-05	0	0	0	0	0
k__Bacteria;p__Bacteroidetes;c__Flavobacteriia;o__Flavobacteriales;f__Flavobacteriaceae;g__Flavobacterium	0	5.68343e-05	0	0	0	0.000966184	0.000227337	5.68343e-05
k__Bacteria;p__Bacteroidetes;c__Flavobacteriia;o__Flavobacteriales;f__Flavobacteriaceae;g__Formosa	0	0	0	0	0	0.00039784	0	0
k__Bacteria;p__Bacteroidetes;c__Flavobacteriia;o__Flavobacteriales;f__Flavobacteriaceae;g__Krokinobacter	0	0	0	0	0	0	0	0
k__Bacteria;p__Bacteroidetes;c__Flavobacteriia;o__Flavobacteriales;f__Flavobacteriaceae;g__Lacinutrix	5.68343e-05	0	0	0	0	0	0	0
k__Bacteria;p__Bacteroidetes;c__Flavobacteriia;o__Flavobacteriales;f__Flavobacteriaceae;g__Lutibacter	0	0	0	0	0	5.68343e-05	0	0
k__Bacteria;p__Bacteroidetes;c__Flavobacteriia;o__Flavobacteriales;f__Flavobacteriaceae;g__Lutimonas	0.000113669	0	0	5.68343e-05	0	5.68343e-05	0	5.68343e-05
k__Bacteria;p__Bacteroidetes;c__Flavobacteriia;o__Flavobacteriales;f__Flavobacteriaceae;g__Muricola	0	0	0	5.68343e-05	5.68343e-05	0.000113669	0	0
k__Bacteria;p__Bacteroidetes;c__Flavobacteriia;o__Flavobacteriales;f__Flavobacteriaceae;g__Persicivirga	0	0	0	0	0	0	0	5.68343e-05
k__Bacteria;p__Bacteroidetes;c__Flavobacteriia;o__Flavobacteriales;f__Flavobacteriaceae;g__Polaribacter	0	5.68343e-05	0	5.68343e-05	0	0.000227337	0.000113669	5.68343e-05
k__Bacteria;p__Bacteroidetes;c__Flavobacteriia;o__Flavobacteriales;f__Flavobacteriaceae;g__Psychroserpens	0	0	0	0	0	0.000454675	0	0
k__Bacteria;p__Bacteroidetes;c__Flavobacteriia;o__Flavobacteriales;f__Flavobacteriaceae;g__Robiginitalea	0	0	0	0	5.68343e-05	0.000113669	0	0
k__Bacteria;p__Bacteroidetes;c__Flavobacteriia;o__Flavobacteriales;f__Flavobacteriaceae;g__Sediminicola	0.000113669	0.000170503	0.000227337	0.000284172	0.000113669	0.000284172	5.68343e-05	0.000227337
k__Bacteria;p__Bacteroidetes;c__Flavobacteriia;o__Flavobacteriales;f__Flavobacteriaceae;g__Tenacibaculum	0	5.68343e-05	0	0	0	0	0	0
k__Bacteria;p__Bacteroidetes;c__Flavobacteriia;o__Flavobacteriales;f__Flavobacteriaceae;g__Winogradskyella	0	0	0	0	0	0.000511509	0	0
k__Bacteria;p__Bacteroidetes;c__Flavobacteriia;o__Flavobacteriales;f__[Weeksellaceae];Other	0	0	0	0	0.000170503	0.000227337	0	0
k__Bacteria;p__Bacteroidetes;c__Flavobacteriia;o__Flavobacteriales;f__[Weeksellaceae];g__	0.000113669	0	0.000113669	0	0.000284172	0.000170503	0	0.000511509
k__Bacteria;p__Bacteroidetes;c__Flavobacteriia;o__Flavobacteriales;f__[Weeksellaceae];g__Chryseobacterium	0.000852515	0	0.000170503	0	0.00255754	0.00812731	0.000341006	0.000738846
k__Bacteria;p__Bacteroidetes;c__Flavobacteriia;o__Flavobacteriales;f__[Weeksellaceae];g__Cloacibacterium	5.68343e-05	0	0	5.68343e-05	0	0.000341006	0	0.000227337
k__Bacteria;p__Bacteroidetes;c__Flavobacteriia;o__Flavobacteriales;f__[Weeksellaceae];g__Elizabethkingia	0.00039784	0	0	0	0.000113669	0.000511509	0	0.000227337
k__Bacteria;p__Bacteroidetes;c__Flavobacteriia;o__Flavobacteriales;f__[Weeksellaceae];g__Wautersiella	0.000170503	0	0	0	0.000682012	0.000568343	0	0.00352373
k__Bacteria;p__Bacteroidetes;c__Sphingobacteriia;o__Sphingobacteriales;Other;Other	0	0	0	0	0	0	0	0
k__Bacteria;p__Bacteroidetes;c__Sphingobacteriia;o__Sphingobacteriales;f__;g__	0	0	0	0	0	0	0	0.000113669
k__Bacteria;p__Bacteroidetes;c__Sphingobacteriia;o__Sphingobacteriales;f__NS11-12;g__	5.68343e-05	0.000113669	5.68343e-05	5.68343e-05	5.68343e-05	5.68343e-05	0	0
k__Bacteria;p__Bacteroidetes;c__Sphingobacteriia;o__Sphingobacteriales;f__Sphingobacteriaceae;Other	0	0	0	0	0	5.68343e-05	0	0
k__Bacteria;p__Bacteroidetes;c__Sphingobacteriia;o__Sphingobacteriales;f__Sphingobacteriaceae;g__	0	0	0	0	0	0.000113669	0	0
k__Bacteria;p__Bacteroidetes;c__Sphingobacteriia;o__Sphingobacteriales;f__Sphingobacteriaceae;g__Pedobacter	0	0	5.68343e-05	0	0	0	0	0.000113669
k__Bacteria;p__Bacteroidetes;c__Sphingobacteriia;o__Sphingobacteriales;f__Sphingobacteriaceae;g__Sphingobacterium	0.00130719	5.68343e-05	0.00136402	5.68343e-05	0.000738846	0.0197215	0.00170503	0.000511509
k__Bacteria;p__Bacteroidetes;c__[Rhodothermi];o__[Rhodothermales];f__Rhodothermaceae;g__	0	5.68343e-05	0	0	5.68343e-05	0.000284172	0	0
k__Bacteria;p__Bacteroidetes;c__[Saprospirae];o__[Saprospirales];f__Chitinophagaceae;Other	0.000170503	0	0.000170503	0	5.68343e-05	0	0	0
k__Bacteria;p__Bacteroidetes;c__[Saprospirae];o__[Saprospirales];f__Chitinophagaceae;g__	5.68343e-05	0	0	0	0.000113669	5.68343e-05	5.68343e-05	0
k__Bacteria;p__Bacteroidetes;c__[Saprospirae];o__[Saprospirales];f__Chitinophagaceae;g__Chitinophaga	0	0	0	0	0	0	0	0
k__Bacteria;p__Bacteroidetes;c__[Saprospirae];o__[Saprospirales];f__Chitinophagaceae;g__Flavisolibacter	0.000682012	0	0	0	0	0	0	0
k__Bacteria;p__Bacteroidetes;c__[Saprospirae];o__[Saprospirales];f__Chitinophagaceae;g__Sediminibacterium	0	0	0	0	0	0.000113669	0	0
k__Bacteria;p__Bacteroidetes;c__[Saprospirae];o__[Saprospirales];f__Saprospiraceae;g__	0	0	0	0	5.68343e-05	0.000568343	0	0
k__Bacteria;p__Caldithrix;c__Caldithrixae;o__Caldithrixales;f__Caldithrixaceae;g__LCP-26	0	0	0	0	0	0	0	0
k__Bacteria;p__Chlorobi;c__;o__;f__;g__	0	0	0	0	0	5.68343e-05	0	0
k__Bacteria;p__Chlorobi;c__Ignavibacteria;o__Ignavibacteriales;f__lheB3-7;g__	0	0	0	0	0	0	0	0
k__Bacteria;p__Chloroflexi;c__Anaerolineae;Other;Other;Other	0	0	0	0	0	5.68343e-05	0	0
k__Bacteria;p__Chloroflexi;c__Anaerolineae;o__Anaerolineales;f__Anaerolinaceae;Other	0	0	0	0	0	0	0	0
k__Bacteria;p__Chloroflexi;c__Anaerolineae;o__Anaerolineales;f__Anaerolinaceae;g__	0	0	0	0	0	0	0	0
k__Bacteria;p__Chloroflexi;c__Anaerolineae;o__Caldilineales;f__Caldilineaceae;g__	0	0	0.000113669	0	0	0.000341006	0	5.68343e-05
k__Bacteria;p__Chloroflexi;c__Anaerolineae;o__Caldilineales;f__Caldilineaceae;g__Litorilinea	0	0	5.68343e-05	0	0	0	0	0
k__Bacteria;p__Chloroflexi;c__Anaerolineae;o__DRC31;f__;g__	0	5.68343e-05	5.68343e-05	0	0	0.000682012	5.68343e-05	0
k__Bacteria;p__Chloroflexi;c__Anaerolineae;o__GCA004;f__;g__	0	0	0.000113669	5.68343e-05	0	0.00369423	0.000170503	5.68343e-05
k__Bacteria;p__Chloroflexi;c__Anaerolineae;o__S0208;f__;g__	0	0	0	5.68343e-05	0	0	0	0
k__Bacteria;p__Chloroflexi;c__Anaerolineae;o__SHA-20;f__;g__	5.68343e-05	0	0	0	0	0	0	0
k__Bacteria;p__Chloroflexi;c__Anaerolineae;o__envOPS12;f__;g__	0	0	0	0	0	5.68343e-05	0	0
k__Bacteria;p__Chloroflexi;c__Chloroflexi;o__AKIW781;f__;g__	0	0	0	0	0	0.000113669	0	0
k__Bacteria;p__Chloroflexi;c__Chloroflexi;o__[Roseiflexales];Other;Other	0	5.68343e-05	0	0	0	0	0	0
k__Bacteria;p__Chloroflexi;c__Dehalococcoidetes;o__GIF9;f__;g__	0	0	0	0	0	0	0	0
k__Bacteria;p__Chloroflexi;c__Ellin6529;o__;f__;g__	0	0	0	0	0	0	0	0
k__Bacteria;p__Chloroflexi;c__Ktedonobacteria;o__Ktedonobacterales;f__Ktedonobacteraceae;g__	0.000113669	0	0	0	0	5.68343e-05	0	0
k__Bacteria;p__Chloroflexi;c__Ktedonobacteria;o__Thermogemmatisporales;Other;Other	0	0	0	0	0	0	5.68343e-05	0
k__Bacteria;p__Chloroflexi;c__Ktedonobacteria;o__Thermogemmatisporales;f__Thermogemmatisporaceae;g__	5.68343e-05	0	5.68343e-05	0	0	0.000511509	0	5.68343e-05
k__Bacteria;p__Chloroflexi;c__TK17;o__;f__;g__	0	5.68343e-05	0	0	0	0	0	0
k__Bacteria;p__Chloroflexi;c__Thermomicrobia;o__AKYG1722;f__;g__	0	0	0	0	0	0	0	0
k__Bacteria;p__Chloroflexi;c__Thermomicrobia;o__JG30-KF-CM45;f__;g__	0	0	0	0	0	0.000170503	0	0.000113669
k__Bacteria;p__Cyanobacteria;Other;Other;Other;Other	0	0	0	0	0	0.000170503	0	0
k__Bacteria;p__Cyanobacteria;c__;o__;f__;g__	0	0	0	0	0	0	0	0
k__Bacteria;p__Cyanobacteria;c__4C0d-2;o__SM2F09;f__;g__	0	0	0	0	0	0	0	0.000170503
k__Bacteria;p__Cyanobacteria;c__4C0d-2;o__YS2;f__;g__	5.68343e-05	0	5.68343e-05	0	0	0.00039784	0	0
k__Bacteria;p__Cyanobacteria;c__Chloroplast;Other;Other;Other	0	0	0	5.68343e-05	5.68343e-05	0	0	0
k__Bacteria;p__Cyanobacteria;c__Chloroplast;o__;f__;g__	0.000113669	0.000227337	0.000170503	0.000170503	0.000227337	0.000227337	0.000341006	0.000170503
k__Bacteria;p__Cyanobacteria;c__Chloroplast;o__CAB-I;f__;g__	0	0	0	0	0.0104575	0.00323956	0.000227337	0.00102302
k__Bacteria;p__Cyanobacteria;c__Chloroplast;o__Chlorophyta;f__Chlamydomonadaceae;Other	0	0	0	0	0	0.000113669	0	0
k__Bacteria;p__Cyanobacteria;c__Chloroplast;o__Chlorophyta;f__Mamiellaceae;g__	0	5.68343e-05	0	5.68343e-05	0	0.000113669	0.000170503	0
k__Bacteria;p__Cyanobacteria;c__Chloroplast;o__Chlorophyta;f__Mamiellaceae;g__Mamiella	0	0	0	0	0	0	0	0
k__Bacteria;p__Cyanobacteria;c__Chloroplast;o__Cryptophyta;f__;g__	5.68343e-05	0	0	0	5.68343e-05	0	5.68343e-05	0
k__Bacteria;p__Cyanobacteria;c__Chloroplast;o__Stramenopiles;f__;g__	5.68343e-05	5.68343e-05	0.000113669	5.68343e-05	5.68343e-05	5.68343e-05	0	0
k__Bacteria;p__Cyanobacteria;c__Chloroplast;o__Streptophyta;f__;g__	0.00392157	0.000227337	0.00261438	0.00352373	0.00193237	0.00238704	0.00130719	0.000852515
k__Bacteria;p__Cyanobacteria;c__Nostocophycideae;o__Nostocales;Other;Other	0	0	0	0	0	0	0	5.68343e-05
k__Bacteria;p__Cyanobacteria;c__Oscillatoriophycideae;o__Chroococcales;f__Xenococcaceae;g__	5.68343e-05	0	0	0	0	0	0	0.000113669
k__Bacteria;p__Cyanobacteria;c__Oscillatoriophycideae;o__Chroococcales;f__Xenococcaceae;g__Chroococcidiopsis	0	0	0	0	0	0.000170503	0	0
k__Bacteria;p__Cyanobacteria;c__Synechococcophycideae;o__Pseudanabaenales;f__Pseudanabaenaceae;Other	0	0	0	0	5.68343e-05	0	0	0
k__Bacteria;p__Cyanobacteria;c__Synechococcophycideae;o__Pseudanabaenales;f__Pseudanabaenaceae;g__Leptolyngbya	0	0	0	0	0	0	0	0
k__Bacteria;p__Deferribacteres;c__Deferribacteres;o__Deferribacterales;f__Deferribacteraceae;g__Mucispirillum	5.68343e-05	0	0.000113669	0	0	5.68343e-05	0	0
k__Bacteria;p__Elusimicrobia;c__Elusimicrobia;o__Elusimicrobiales;f__Elusimicrobiaceae;g__	0	0	0	0	0	0	0	0
k__Bacteria;p__FBP;c__;o__;f__;g__	0	0	0	0	0	0	0	0
k__Bacteria;p__Firmicutes;Other;Other;Other;Other	0	0	0	0	5.68343e-05	0	0	0
k__Bacteria;p__Firmicutes;c__Bacilli;Other;Other;Other	0.000113669	5.68343e-05	0.000170503	0	5.68343e-05	0	0	0
k__Bacteria;p__Firmicutes;c__Bacilli;o__Bacillales;Other;Other	0	0	0	5.68343e-05	0	0	0.000113669	0
k__Bacteria;p__Firmicutes;c__Bacilli;o__Bacillales;f__Alicyclobacillaceae;g__Alicyclobacillus	5.68343e-05	0	0	0	0	0	0	0
k__Bacteria;p__Firmicutes;c__Bacilli;o__Bacillales;f__Bacillaceae;g__Bacillus	0.000454675	0	0.000341006	5.68343e-05	0.00039784	0.00119352	0.000170503	0.000113669
k__Bacteria;p__Firmicutes;c__Bacilli;o__Bacillales;f__Bacillaceae;g__Geobacillus	0	0	0	0	0	0	0	0
k__Bacteria;p__Firmicutes;c__Bacilli;o__Bacillales;f__Bacillaceae;g__Virgibacillus	0	0	0	0	0	0	0	0
k__Bacteria;p__Firmicutes;c__Bacilli;o__Bacillales;f__Paenibacillaceae;g__Brevibacillus	0	0	0	0	0	0	0	0
k__Bacteria;p__Firmicutes;c__Bacilli;o__Bacillales;f__Paenibacillaceae;g__Paenibacillus	0	0	0	0	0	0	0	0
k__Bacteria;p__Firmicutes;c__Bacilli;o__Bacillales;f__Planococcaceae;Other	0	0	0	0	0	5.68343e-05	0	0
k__Bacteria;p__Firmicutes;c__Bacilli;o__Bacillales;f__Planococcaceae;g__Lysinibacillus	0	5.68343e-05	0	0	0	0	0	0
k__Bacteria;p__Firmicutes;c__Bacilli;o__Bacillales;f__Planococcaceae;g__Paenisporosarcina	0	0	0	0	5.68343e-05	0	0	0
k__Bacteria;p__Firmicutes;c__Bacilli;o__Bacillales;f__Planococcaceae;g__Solibacillus	0	0	5.68343e-05	0	0	0	0	0
k__Bacteria;p__Firmicutes;c__Bacilli;o__Bacillales;f__Planococcaceae;g__Staphylococcus	0	0	0	0	0	0	0	0
k__Bacteria;p__Firmicutes;c__Bacilli;o__Bacillales;f__Staphylococcaceae;g__Macrococcus	0	0	0	0	0	0	0	0
k__Bacteria;p__Firmicutes;c__Bacilli;o__Bacillales;f__Staphylococcaceae;g__Staphylococcus	0.00187553	0.000284172	0.000284172	0.00119352	0.00147769	0.0036374	0.00119352	0.000852515
k__Bacteria;p__Firmicutes;c__Bacilli;o__Bacillales;f__[Exiguobacteraceae];g__Exiguobacterium	0	0	0	0	0	0	0	0
k__Bacteria;p__Firmicutes;c__Bacilli;o__Bacillales;f__[Thermicanaceae];g__Thermicanus	0	0	0	0	0	0	0	0
k__Bacteria;p__Firmicutes;c__Bacilli;o__Lactobacillales;Other;Other	0.00039784	0.000682012	0.000170503	0.000341006	0.000113669	0.000113669	0.000227337	5.68343e-05
k__Bacteria;p__Firmicutes;c__Bacilli;o__Lactobacillales;f__Aerococcaceae;g__Aerococcus	0	0	0	0	0	0	5.68343e-05	0
k__Bacteria;p__Firmicutes;c__Bacilli;o__Lactobacillales;f__Aerococcaceae;g__Alloiococcus	0	0	0	0	0	0	0	0
k__Bacteria;p__Firmicutes;c__Bacilli;o__Lactobacillales;f__Aerococcaceae;g__Facklamia	0	0	0	0	0	0.000341006	0	0
k__Bacteria;p__Firmicutes;c__Bacilli;o__Lactobacillales;f__Carnobacteriaceae;g__Trichococcus	0	0	0	0	0	5.68343e-05	0	0
k__Bacteria;p__Firmicutes;c__Bacilli;o__Lactobacillales;f__Enterococcaceae;Other	0	0	0	0	0	0	0	0
k__Bacteria;p__Firmicutes;c__Bacilli;o__Lactobacillales;f__Enterococcaceae;g__Enterococcus	0.0122194	0.000113669	0.00130719	0.00443308	0.00039784	0.00039784	0.000113669	0.000170503
k__Bacteria;p__Firmicutes;c__Bacilli;o__Lactobacillales;f__Enterococcaceae;g__Tetragenococcus	0	0	0	0	0	0	0	0
k__Bacteria;p__Firmicutes;c__Bacilli;o__Lactobacillales;f__Lactobacillaceae;Other	0.00119352	0.00261438	0.0018187	0.00329639	0.00113669	0	0.000341006	0.000738846
k__Bacteria;p__Firmicutes;c__Bacilli;o__Lactobacillales;f__Lactobacillaceae;g__	0	0	5.68343e-05	0	0	0	0	0
k__Bacteria;p__Firmicutes;c__Bacilli;o__Lactobacillales;f__Lactobacillaceae;g__Lactobacillus	0.905541	0.989429	0.976073	0.972947	0.729412	0.122421	0.839273	0.383973
k__Bacteria;p__Firmicutes;c__Bacilli;o__Lactobacillales;f__Lactobacillaceae;g__Pediococcus	0.000113669	0	0.000113669	0	0.000170503	5.68343e-05	0.000113669	0.000170503
k__Bacteria;p__Firmicutes;c__Bacilli;o__Lactobacillales;f__Leuconostocaceae;g__	5.68343e-05	0	0	0.000113669	5.68343e-05	5.68343e-05	0	0
k__Bacteria;p__Firmicutes;c__Bacilli;o__Lactobacillales;f__Leuconostocaceae;g__Leuconostoc	0	0	0	0	0	0.000113669	0	0
k__Bacteria;p__Firmicutes;c__Bacilli;o__Lactobacillales;f__Leuconostocaceae;g__Weissella	0	0	0	0	0.000113669	0	0	0
k__Bacteria;p__Firmicutes;c__Bacilli;o__Lactobacillales;f__Streptococcaceae;g__Lactococcus	0	0	0	0	0.000113669	0.000227337	0	0
k__Bacteria;p__Firmicutes;c__Bacilli;o__Lactobacillales;f__Streptococcaceae;g__Streptococcus	0.00102302	0	0.000511509	5.68343e-05	0.000227337	0.000511509	0	0
k__Bacteria;p__Firmicutes;c__Bacilli;o__Turicibacterales;f__Turicibacteraceae;g__Turicibacter	5.68343e-05	0	0	0	0	0.000170503	0	0
k__Bacteria;p__Firmicutes;c__Clostridia;o__Clostridiales;Other;Other	0.000170503	0	5.68343e-05	0.000170503	5.68343e-05	5.68343e-05	0	0.000170503
k__Bacteria;p__Firmicutes;c__Clostridia;o__Clostridiales;f__;g__	0.00039784	0	0.000284172	5.68343e-05	0.000113669	0.000170503	0	0.000113669
k__Bacteria;p__Firmicutes;c__Clostridia;o__Clostridiales;f__Christensenellaceae;Other	0	0	0	0	0	0	0	0
k__Bacteria;p__Firmicutes;c__Clostridia;o__Clostridiales;f__Christensenellaceae;g__	0	0	0	0	0	0	0	0
k__Bacteria;p__Firmicutes;c__Clostridia;o__Clostridiales;f__Christensenellaceae;g__Christensenella	0	0	0	5.68343e-05	0	0.000113669	0	0
k__Bacteria;p__Firmicutes;c__Clostridia;o__Clostridiales;f__Clostridiaceae;Other	0	0	0	0	0	0	0	0
k__Bacteria;p__Firmicutes;c__Clostridia;o__Clostridiales;f__Clostridiaceae;g__	0	0	0	5.68343e-05	0	0	0	0
k__Bacteria;p__Firmicutes;c__Clostridia;o__Clostridiales;f__Clostridiaceae;g__Candidatus Arthromitus	0	0	0	0	5.68343e-05	0.000113669	0	0
k__Bacteria;p__Firmicutes;c__Clostridia;o__Clostridiales;f__Clostridiaceae;g__Clostridium	5.68343e-05	0	5.68343e-05	0	5.68343e-05	0.000795681	0.000227337	5.68343e-05
k__Bacteria;p__Firmicutes;c__Clostridia;o__Clostridiales;f__Dehalobacteriaceae;g__	0	0	0	0	0	0	0	0
k__Bacteria;p__Firmicutes;c__Clostridia;o__Clostridiales;f__Dehalobacteriaceae;g__Dehalobacterium	0	5.68343e-05	0	0	0	0	0	0
k__Bacteria;p__Firmicutes;c__Clostridia;o__Clostridiales;f__Eubacteriaceae;g__Acetobacterium	0	0	0	0	0	0	5.68343e-05	0
k__Bacteria;p__Firmicutes;c__Clostridia;o__Clostridiales;f__Eubacteriaceae;g__Anaerofustis	5.68343e-05	0	0	0	0	0	0	0
k__Bacteria;p__Firmicutes;c__Clostridia;o__Clostridiales;f__Eubacteriaceae;g__Pseudoramibacter_Eubacterium	0	0	5.68343e-05	0	0	0	0	0
k__Bacteria;p__Firmicutes;c__Clostridia;o__Clostridiales;f__Lachnospiraceae;Other	0	0	0	0	0	5.68343e-05	0	0
k__Bacteria;p__Firmicutes;c__Clostridia;o__Clostridiales;f__Lachnospiraceae;g__	0.000113669	0	0.000113669	5.68343e-05	5.68343e-05	0.000170503	0	5.68343e-05
k__Bacteria;p__Firmicutes;c__Clostridia;o__Clostridiales;f__Lachnospiraceae;g__Blautia	0	0	0	0	0	0.000170503	0	0
k__Bacteria;p__Firmicutes;c__Clostridia;o__Clostridiales;f__Lachnospiraceae;g__Coprococcus	0	0	0	0	0	0	0	0
k__Bacteria;p__Firmicutes;c__Clostridia;o__Clostridiales;f__Lachnospiraceae;g__Dorea	0.000284172	0	0	0	0	0	0	0
k__Bacteria;p__Firmicutes;c__Clostridia;o__Clostridiales;f__Lachnospiraceae;g__Epulopiscium	0	0	0	0	0	0	0.000113669	0
k__Bacteria;p__Firmicutes;c__Clostridia;o__Clostridiales;f__Lachnospiraceae;g__Ruminococcus	0	0	0	0	0	0	0	0
k__Bacteria;p__Firmicutes;c__Clostridia;o__Clostridiales;f__Lachnospiraceae;g__Shuttleworthia	0	0	0	0	0	0	0	0
k__Bacteria;p__Firmicutes;c__Clostridia;o__Clostridiales;f__Lachnospiraceae;g__[Ruminococcus]	0.00039784	0	0	0	0	0.000284172	0	0
k__Bacteria;p__Firmicutes;c__Clostridia;o__Clostridiales;f__Peptococcaceae;g__	0	0	0	0	5.68343e-05	0	0	0
k__Bacteria;p__Firmicutes;c__Clostridia;o__Clostridiales;f__Peptostreptococcaceae;g__	5.68343e-05	5.68343e-05	0	0	0.000170503	0.000909349	0.000113669	0
k__Bacteria;p__Firmicutes;c__Clostridia;o__Clostridiales;f__Peptostreptococcaceae;g__Clostridium	0	0	0	0	0	5.68343e-05	0	0
k__Bacteria;p__Firmicutes;c__Clostridia;o__Clostridiales;f__Peptostreptococcaceae;g__Peptostreptococcus	0	0	0	0	0	0	0	0
k__Bacteria;p__Firmicutes;c__Clostridia;o__Clostridiales;f__Peptostreptococcaceae;g__[Clostridium]	5.68343e-05	0	0	0	0	0	0	0
k__Bacteria;p__Firmicutes;c__Clostridia;o__Clostridiales;f__Ruminococcaceae;Other	0.000113669	0	0.000341006	0	5.68343e-05	0	5.68343e-05	5.68343e-05
k__Bacteria;p__Firmicutes;c__Clostridia;o__Clostridiales;f__Ruminococcaceae;g__	0.000795681	0.000113669	0.000170503	5.68343e-05	5.68343e-05	0.000284172	5.68343e-05	0
k__Bacteria;p__Firmicutes;c__Clostridia;o__Clostridiales;f__Ruminococcaceae;g__Anaerofilum	0	0	0	0	0	0	0	5.68343e-05
k__Bacteria;p__Firmicutes;c__Clostridia;o__Clostridiales;f__Ruminococcaceae;g__Butyricicoccus	0.000227337	0	0	0	5.68343e-05	5.68343e-05	0	0
k__Bacteria;p__Firmicutes;c__Clostridia;o__Clostridiales;f__Ruminococcaceae;g__Clostridium	0	0	0	0	0	0	0	0
k__Bacteria;p__Firmicutes;c__Clostridia;o__Clostridiales;f__Ruminococcaceae;g__Faecalibacterium	5.68343e-05	0	0.000227337	0	5.68343e-05	0.000113669	0	0
k__Bacteria;p__Firmicutes;c__Clostridia;o__Clostridiales;f__Ruminococcaceae;g__Oscillospira	0.000227337	0	5.68343e-05	0	5.68343e-05	0.000113669	5.68343e-05	0
k__Bacteria;p__Firmicutes;c__Clostridia;o__Clostridiales;f__Ruminococcaceae;g__Ruminococcus	0.000113669	5.68343e-05	5.68343e-05	0	0	0.000113669	0	0
k__Bacteria;p__Firmicutes;c__Clostridia;o__Clostridiales;f__Veillonellaceae;Other	0.000852515	0	0	0	0	0	0	5.68343e-05
k__Bacteria;p__Firmicutes;c__Clostridia;o__Clostridiales;f__Veillonellaceae;g__Acidaminococcus	0	0	0	0	0	5.68343e-05	0	0
k__Bacteria;p__Firmicutes;c__Clostridia;o__Clostridiales;f__Veillonellaceae;g__Dialister	0	0	0	0	0.000113669	0	0	0
k__Bacteria;p__Firmicutes;c__Clostridia;o__Clostridiales;f__Veillonellaceae;g__Megamonas	5.68343e-05	0	0	0	0	0.000568343	0	0
k__Bacteria;p__Firmicutes;c__Clostridia;o__Clostridiales;f__Veillonellaceae;g__Megasphaera	5.68343e-05	0	0	0	0	0.000113669	0	0
k__Bacteria;p__Firmicutes;c__Clostridia;o__Clostridiales;f__Veillonellaceae;g__Phascolarctobacterium	0.000170503	0	0	0	5.68343e-05	5.68343e-05	0	0
k__Bacteria;p__Firmicutes;c__Clostridia;o__Clostridiales;f__Veillonellaceae;g__Selenomonas	0	0	0	0	5.68343e-05	0	0	0
k__Bacteria;p__Firmicutes;c__Clostridia;o__Clostridiales;f__Veillonellaceae;g__Succinispira	0	0	0	0	0	0	0	0
k__Bacteria;p__Firmicutes;c__Clostridia;o__Clostridiales;f__Veillonellaceae;g__Veillonella	0.0335891	0	0	0	0.000170503	0.000454675	0	0.000568343
k__Bacteria;p__Firmicutes;c__Clostridia;o__Clostridiales;f__[Acidaminobacteraceae];g__Fusibacter	0	0	0	0	0	5.68343e-05	0	0
k__Bacteria;p__Firmicutes;c__Clostridia;o__Clostridiales;f__[Mogibacteriaceae];g__	0	0	0.000113669	0	0	0	0	5.68343e-05
k__Bacteria;p__Firmicutes;c__Clostridia;o__Clostridiales;f__[Mogibacteriaceae];g__Anaerovorax	0	0	0	0	0	5.68343e-05	0	0
k__Bacteria;p__Firmicutes;c__Clostridia;o__Clostridiales;f__[Tissierellaceae];g__1-68	0	0	0	0	0	0	0	0
k__Bacteria;p__Firmicutes;c__Clostridia;o__Clostridiales;f__[Tissierellaceae];g__Anaerococcus	0	0	0	5.68343e-05	5.68343e-05	0.000227337	0	0
k__Bacteria;p__Firmicutes;c__Clostridia;o__Clostridiales;f__[Tissierellaceae];g__Finegoldia	0	0	0	0	0.000227337	0	0.000113669	0
k__Bacteria;p__Firmicutes;c__Clostridia;o__Clostridiales;f__[Tissierellaceae];g__Peptoniphilus	0	0	0	0	0	0.000170503	0	0
k__Bacteria;p__Firmicutes;c__Erysipelotrichi;o__Erysipelotrichales;f__Erysipelotrichaceae;Other	0	0	0	0	0	0	0	0
k__Bacteria;p__Firmicutes;c__Erysipelotrichi;o__Erysipelotrichales;f__Erysipelotrichaceae;g__	0.000113669	0.000113669	0.000227337	0.000170503	0.000170503	0.000113669	0.000113669	0.000170503
k__Bacteria;p__Firmicutes;c__Erysipelotrichi;o__Erysipelotrichales;f__Erysipelotrichaceae;g__Anaerorhabdus	5.68343e-05	0.000113669	0	5.68343e-05	0	0	0.000113669	0
k__Bacteria;p__Firmicutes;c__Erysipelotrichi;o__Erysipelotrichales;f__Erysipelotrichaceae;g__Coprobacillus	0	0	0	5.68343e-05	0	0	0	0
k__Bacteria;p__Firmicutes;c__Erysipelotrichi;o__Erysipelotrichales;f__Erysipelotrichaceae;g__Erysipelothrix	0	0	0	0	0	0	0	0
k__Bacteria;p__Firmicutes;c__Erysipelotrichi;o__Erysipelotrichales;f__Erysipelotrichaceae;g__[Eubacterium]	0.00039784	0	5.68343e-05	0	0	0	5.68343e-05	0
k__Bacteria;p__Fusobacteria;c__Fusobacteriia;o__Fusobacteriales;f__Fusobacteriaceae;g__	0	0	0	0	0	5.68343e-05	0	0
k__Bacteria;p__Fusobacteria;c__Fusobacteriia;o__Fusobacteriales;f__Fusobacteriaceae;g__Cetobacterium	0	0	0.000170503	0	0	5.68343e-05	0	0
k__Bacteria;p__Fusobacteria;c__Fusobacteriia;o__Fusobacteriales;f__Fusobacteriaceae;g__Fusobacterium	0	0	0	0	0.000113669	0.00176186	0	0.000113669
k__Bacteria;p__Fusobacteria;c__Fusobacteriia;o__Fusobacteriales;f__Leptotrichiaceae;Other	0	0	0	0	0	5.68343e-05	0	0
k__Bacteria;p__Fusobacteria;c__Fusobacteriia;o__Fusobacteriales;f__Leptotrichiaceae;g__	0	0	0	0	0.000170503	0.000170503	0	0.000568343
k__Bacteria;p__GN02;c__BD1-5;o__;f__;g__	0	0	0	0	0	5.68343e-05	0	0
k__Bacteria;p__Gemmatimonadetes;c__Gemm-1;o__;f__;g__	0	0	0	0	0	0	0	0
k__Bacteria;p__Gemmatimonadetes;c__Gemm-2;o__;f__;g__	5.68343e-05	0	0	0	0	5.68343e-05	0	0
k__Bacteria;p__Gemmatimonadetes;c__Gemm-4;o__;f__;g__	0	0	5.68343e-05	0	0	0.000170503	0	0
k__Bacteria;p__Gemmatimonadetes;c__Gemmatimonadetes;o__KD8-87;f__;g__	0	5.68343e-05	0	0	0	0	0	0
k__Bacteria;p__KSB3;c__;o__;f__;g__	0	0	0	0	0	0	0	0
k__Bacteria;p__Lentisphaerae;c__[Lentisphaeria];o__Lentisphaerales;f__;g__	0	0	0	5.68343e-05	0	0.000113669	0	0
k__Bacteria;p__Lentisphaerae;c__[Lentisphaeria];o__Victivallales;f__Victivallaceae;Other	0	0	0	0	0	0	0	5.68343e-05
k__Bacteria;p__Lentisphaerae;c__[Lentisphaeria];o__Victivallales;f__Victivallaceae;g__	0	5.68343e-05	5.68343e-05	0	0	0	5.68343e-05	0
k__Bacteria;p__Lentisphaerae;c__[Lentisphaeria];o__Victivallales;f__Victivallaceae;g__Victivallis	0	0	0	0	0	0	0	0
k__Bacteria;p__NKB19;c__;o__;f__;g__	0	0	0	5.68343e-05	0	0.000113669	0	0
k__Bacteria;p__Nitrospirae;c__Nitrospira;o__Nitrospirales;f__Nitrospiraceae;g__	0	0	0	0	0	0	0	0
k__Bacteria;p__OD1;c__ZB2;o__;f__;g__	0	0	0	0	0	0.000227337	0	0
k__Bacteria;p__OP3;c__koll11;o__GIF10;f__kpj58rc;g__	0	0	0	0	0	0	0	0
k__Bacteria;p__Planctomycetes;c__028H05-P-BN-P5;o__;f__;g__	0	0	0	5.68343e-05	0	0	0	0
k__Bacteria;p__Planctomycetes;c__BD7-11;o__;f__;g__	0	0	0	0	0	5.68343e-05	0	0
k__Bacteria;p__Planctomycetes;c__C6;o__d113;f__;g__	0	0	0	0	0	0.000170503	0	0
k__Bacteria;p__Planctomycetes;c__OM190;o__CL500-15;f__;g__	0	0	0	0	0	5.68343e-05	0	0
k__Bacteria;p__Planctomycetes;c__OM190;o__agg27;f__;g__	0	0	0	0	0	0	0	0
k__Bacteria;p__Planctomycetes;c__Phycisphaerae;o__WD2101;f__;g__	0	0	0	0	0	5.68343e-05	0	0
k__Bacteria;p__Planctomycetes;c__Pla3;o__;f__;g__	0	0	0	0	0	0.000341006	0	0
k__Bacteria;p__Planctomycetes;c__Planctomycetia;Other;Other;Other	0	0	0	0	0	5.68343e-05	0	0
k__Bacteria;p__Planctomycetes;c__Planctomycetia;o__B97;f__;g__	0	0	0	0	0	0	0	0
k__Bacteria;p__Planctomycetes;c__Planctomycetia;o__Gemmatales;f__Gemmataceae;g__Gemmata	0	0	0	0	0	0	0	0
k__Bacteria;p__Planctomycetes;c__Planctomycetia;o__Gemmatales;f__Isosphaeraceae;g__	0	0	0	0	0	5.68343e-05	0	0
k__Bacteria;p__Planctomycetes;c__Planctomycetia;o__Pirellulales;f__Pirellulaceae;g__	5.68343e-05	0	5.68343e-05	0.000284172	0.000113669	0.0021597	0	0
k__Bacteria;p__Planctomycetes;c__Planctomycetia;o__Pirellulales;f__Pirellulaceae;g__Planctomycete	0	0	0	0	0	0.000852515	0	0
k__Bacteria;p__Planctomycetes;c__Planctomycetia;o__Pirellulales;f__Pirellulaceae;g__planctomycete	0	0	0	5.68343e-05	0	0.000511509	0	0
k__Bacteria;p__Planctomycetes;c__Planctomycetia;o__Planctomycetales;f__Planctomycetaceae;g__Planctomyces	0	0	0	0	5.68343e-05	0.00176186	0	0
k__Bacteria;p__Planctomycetes;c__[Brocadiae];o__Brocadiales;Other;Other	0	0	0	0	0	0	0	0
k__Bacteria;p__Planctomycetes;c__vadinHA49;o__PeHg47;f__;g__	0	0	0	0	0	0	0	0
k__Bacteria;p__Proteobacteria;Other;Other;Other;Other	0.0019892	0.000284172	0.00113669	0.00653595	0.199829	0.485706	0.0832055	0.347315
k__Bacteria;p__Proteobacteria;c__Alphaproteobacteria;Other;Other;Other	0.000113669	0	5.68343e-05	0.000170503	0.00284172	0.00261438	0.000852515	0.00466041
k__Bacteria;p__Proteobacteria;c__Alphaproteobacteria;o__;f__;g__	0	5.68343e-05	0.000113669	5.68343e-05	5.68343e-05	0.000113669	5.68343e-05	0
k__Bacteria;p__Proteobacteria;c__Alphaproteobacteria;o__BD7-3;f__;g__	0	0	0	0	0	0	0	0
k__Bacteria;p__Proteobacteria;c__Alphaproteobacteria;o__Caulobacterales;f__Caulobacteraceae;Other	5.68343e-05	0	0	0	0	0.000227337	0	0
k__Bacteria;p__Proteobacteria;c__Alphaproteobacteria;o__Caulobacterales;f__Caulobacteraceae;g__	0.000795681	5.68343e-05	0.000341006	5.68343e-05	0.000227337	0.00500142	0.000795681	0.000341006
k__Bacteria;p__Proteobacteria;c__Alphaproteobacteria;o__Caulobacterales;f__Caulobacteraceae;g__Brevundimonas	0.000909349	0.000113669	0.000341006	0	0.000568343	0.00733163	0.00204604	0.000682012
k__Bacteria;p__Proteobacteria;c__Alphaproteobacteria;o__Caulobacterales;f__Caulobacteraceae;g__Caulobacter	0	0	0	0	5.68343e-05	0.000511509	0.000227337	0
k__Bacteria;p__Proteobacteria;c__Alphaproteobacteria;o__Caulobacterales;f__Caulobacteraceae;g__Mycoplana	0.000170503	5.68343e-05	0.000341006	5.68343e-05	0.000568343	0.00642228	0.00153453	0.000511509
k__Bacteria;p__Proteobacteria;c__Alphaproteobacteria;o__Caulobacterales;f__Caulobacteraceae;g__Nitrobacteria	5.68343e-05	0	0	0	0	0.000511509	0	5.68343e-05
k__Bacteria;p__Proteobacteria;c__Alphaproteobacteria;o__Kiloniellales;f__;g__	0	0	0	0	0	0.000511509	0	5.68343e-05
k__Bacteria;p__Proteobacteria;c__Alphaproteobacteria;o__Kordiimonadales;Other;Other	0	0	0	0	0	0	5.68343e-05	0
k__Bacteria;p__Proteobacteria;c__Alphaproteobacteria;o__Kordiimonadales;f__Kordiimonadaceae;g__	0	0	0	0	0	0	0	0
k__Bacteria;p__Proteobacteria;c__Alphaproteobacteria;o__RF32;f__;g__	0	0	5.68343e-05	0	0	0.000113669	0	0
k__Bacteria;p__Proteobacteria;c__Alphaproteobacteria;o__Rhizobiales;Other;Other	0.000113669	5.68343e-05	0	0	0	0.000341006	0	0
k__Bacteria;p__Proteobacteria;c__Alphaproteobacteria;o__Rhizobiales;f__;g__	0.000227337	0	0	5.68343e-05	0	0.000113669	0	0
k__Bacteria;p__Proteobacteria;c__Alphaproteobacteria;o__Rhizobiales;f__Aurantimonadaceae;g__	0	0	0	0	0	0.000113669	0	0
k__Bacteria;p__Proteobacteria;c__Alphaproteobacteria;o__Rhizobiales;f__Aurantimonadaceae;g__Aurantimonas	0	0	0	0	0	0	0	0
k__Bacteria;p__Proteobacteria;c__Alphaproteobacteria;o__Rhizobiales;f__Beijerinckiaceae;Other	0.000113669	0	0	0	0	0	0	0
k__Bacteria;p__Proteobacteria;c__Alphaproteobacteria;o__Rhizobiales;f__Beijerinckiaceae;g__	0	0	0	0	0	0.000341006	0	0
k__Bacteria;p__Proteobacteria;c__Alphaproteobacteria;o__Rhizobiales;f__Beijerinckiaceae;g__Beijerinckia	0	0	0	0	0	0	0	0
k__Bacteria;p__Proteobacteria;c__Alphaproteobacteria;o__Rhizobiales;f__Beijerinckiaceae;g__Chelatococcus	5.68343e-05	0	0	0	0	0	0	0
k__Bacteria;p__Proteobacteria;c__Alphaproteobacteria;o__Rhizobiales;f__Bradyrhizobiaceae;Other	5.68343e-05	0	0	0	0	0.000568343	0	0.000113669
k__Bacteria;p__Proteobacteria;c__Alphaproteobacteria;o__Rhizobiales;f__Bradyrhizobiaceae;g__	0.00375107	5.68343e-05	5.68343e-05	0	0.00039784	0.00176186	0.000170503	0.000341006
k__Bacteria;p__Proteobacteria;c__Alphaproteobacteria;o__Rhizobiales;f__Bradyrhizobiaceae;g__Afipia	0	0	0	0	0	0	0	0
k__Bacteria;p__Proteobacteria;c__Alphaproteobacteria;o__Rhizobiales;f__Bradyrhizobiaceae;g__Bosea	0.00170503	0.000227337	0.000682012	5.68343e-05	0.000909349	0.0185848	0.000966184	0.000682012
k__Bacteria;p__Proteobacteria;c__Alphaproteobacteria;o__Rhizobiales;f__Bradyrhizobiaceae;g__Bradyrhizobium	5.68343e-05	0	5.68343e-05	0	0.000113669	0.000170503	0	0
k__Bacteria;p__Proteobacteria;c__Alphaproteobacteria;o__Rhizobiales;f__Brucellaceae;g__Ochrobactrum	0.000795681	0	0.000170503	0	0.000284172	0.00187553	0.000113669	0.000170503
k__Bacteria;p__Proteobacteria;c__Alphaproteobacteria;o__Rhizobiales;f__Brucellaceae;g__Pseudochrobactrum	0	0	0	0	0	0.000113669	0	0
k__Bacteria;p__Proteobacteria;c__Alphaproteobacteria;o__Rhizobiales;f__Hyphomicrobiaceae;Other	0	0	0	0	0	0.000113669	0	0
k__Bacteria;p__Proteobacteria;c__Alphaproteobacteria;o__Rhizobiales;f__Hyphomicrobiaceae;g__	0	0	0	0	0	0.000170503	0	0
k__Bacteria;p__Proteobacteria;c__Alphaproteobacteria;o__Rhizobiales;f__Hyphomicrobiaceae;g__Devosia	0	0	5.68343e-05	0	0	0.000227337	0	0
k__Bacteria;p__Proteobacteria;c__Alphaproteobacteria;o__Rhizobiales;f__Hyphomicrobiaceae;g__Hyphomicrobium	0	0	0	0	0	0.000454675	0	0
k__Bacteria;p__Proteobacteria;c__Alphaproteobacteria;o__Rhizobiales;f__Hyphomicrobiaceae;g__Pedomicrobium	0	0	5.68343e-05	0	0	0	0	5.68343e-05
k__Bacteria;p__Proteobacteria;c__Alphaproteobacteria;o__Rhizobiales;f__Hyphomicrobiaceae;g__Polymorphum	0	0	0	0	0	5.68343e-05	0	0
k__Bacteria;p__Proteobacteria;c__Alphaproteobacteria;o__Rhizobiales;f__Hyphomicrobiaceae;g__Rhodoplanes	0	0	0	0	0	0	0	0
k__Bacteria;p__Proteobacteria;c__Alphaproteobacteria;o__Rhizobiales;f__Methylobacteriaceae;g__	0.000227337	0	0.000170503	0	0.000113669	0.00210287	0.000227337	0.000284172
k__Bacteria;p__Proteobacteria;c__Alphaproteobacteria;o__Rhizobiales;f__Methylobacteriaceae;g__Methylobacterium	0.000227337	0	0.000113669	0	0.00039784	0.00170503	5.68343e-05	0.000227337
k__Bacteria;p__Proteobacteria;c__Alphaproteobacteria;o__Rhizobiales;f__Methylocystaceae;g__	0	0	0	0	0	0	0	0
k__Bacteria;p__Proteobacteria;c__Alphaproteobacteria;o__Rhizobiales;f__Phyllobacteriaceae;g__	5.68343e-05	0	0	0	0	0.000170503	0	0
k__Bacteria;p__Proteobacteria;c__Alphaproteobacteria;o__Rhizobiales;f__Phyllobacteriaceae;g__Phyllobacterium	5.68343e-05	0	5.68343e-05	0	0.000113669	0.000113669	5.68343e-05	0
k__Bacteria;p__Proteobacteria;c__Alphaproteobacteria;o__Rhizobiales;f__Rhizobiaceae;Other	0	0	0	0	0	0	0	0
k__Bacteria;p__Proteobacteria;c__Alphaproteobacteria;o__Rhizobiales;f__Rhizobiaceae;g__Agrobacterium	0.000113669	0	5.68343e-05	5.68343e-05	0.000113669	5.68343e-05	0	0
k__Bacteria;p__Proteobacteria;c__Alphaproteobacteria;o__Rhizobiales;f__Rhizobiaceae;g__Shinella	0	0	0	0	5.68343e-05	0	0	0
k__Bacteria;p__Proteobacteria;c__Alphaproteobacteria;o__Rhodobacterales;f__Rhodobacteraceae;Other	5.68343e-05	0	0.000113669	0.000170503	0.000170503	0.000966184	5.68343e-05	0
k__Bacteria;p__Proteobacteria;c__Alphaproteobacteria;o__Rhodobacterales;f__Rhodobacteraceae;g__	5.68343e-05	0	0	5.68343e-05	0	0.000568343	0	0
k__Bacteria;p__Proteobacteria;c__Alphaproteobacteria;o__Rhodobacterales;f__Rhodobacteraceae;g__Albidovulum	0	0	0	0	0	5.68343e-05	0	0
k__Bacteria;p__Proteobacteria;c__Alphaproteobacteria;o__Rhodobacterales;f__Rhodobacteraceae;g__Amaricoccus	0	0	0	0	0	5.68343e-05	0	0
k__Bacteria;p__Proteobacteria;c__Alphaproteobacteria;o__Rhodobacterales;f__Rhodobacteraceae;g__Anaerospora	0	0	0	0	5.68343e-05	0.00039784	0	5.68343e-05
k__Bacteria;p__Proteobacteria;c__Alphaproteobacteria;o__Rhodobacterales;f__Rhodobacteraceae;g__Loktanella	5.68343e-05	0	0.000170503	5.68343e-05	0	0	5.68343e-05	0
k__Bacteria;p__Proteobacteria;c__Alphaproteobacteria;o__Rhodobacterales;f__Rhodobacteraceae;g__Octadecabacter	0	5.68343e-05	0	0	0	5.68343e-05	5.68343e-05	5.68343e-05
k__Bacteria;p__Proteobacteria;c__Alphaproteobacteria;o__Rhodobacterales;f__Rhodobacteraceae;g__Paracoccus	0.000170503	0	0	0	0	0.00107985	5.68343e-05	0
k__Bacteria;p__Proteobacteria;c__Alphaproteobacteria;o__Rhodobacterales;f__Rhodobacteraceae;g__Phaeobacter	5.68343e-05	0	5.68343e-05	0	5.68343e-05	0.000170503	0	0
k__Bacteria;p__Proteobacteria;c__Alphaproteobacteria;o__Rhodobacterales;f__Rhodobacteraceae;g__Rhodobacter	0	0	0	0	0	0	0	0
k__Bacteria;p__Proteobacteria;c__Alphaproteobacteria;o__Rhodobacterales;f__Rhodobacteraceae;g__Roseivivax	0	0	0	0	0	0.000170503	0	5.68343e-05
k__Bacteria;p__Proteobacteria;c__Alphaproteobacteria;o__Rhodobacterales;f__Rhodobacteraceae;g__Roseobacter	0	0	0	0	0	0.000284172	0	0
k__Bacteria;p__Proteobacteria;c__Alphaproteobacteria;o__Rhodobacterales;f__Rhodobacteraceae;g__Roseovarius	0	0	0	0	0	0	0	0
k__Bacteria;p__Proteobacteria;c__Alphaproteobacteria;o__Rhodobacterales;f__Rhodobacteraceae;g__Rubellimicrobium	0	0	0	0	0	0	5.68343e-05	5.68343e-05
k__Bacteria;p__Proteobacteria;c__Alphaproteobacteria;o__Rhodobacterales;f__Rhodobacteraceae;g__Ruegeria	5.68343e-05	0	0	0	0	5.68343e-05	0	0
k__Bacteria;p__Proteobacteria;c__Alphaproteobacteria;o__Rhodospirillales;f__;g__	0	0	0	0	0	0.000170503	0	0
k__Bacteria;p__Proteobacteria;c__Alphaproteobacteria;o__Rhodospirillales;f__Acetobacteraceae;Other	0	0	5.68343e-05	0	0	0	0	0
k__Bacteria;p__Proteobacteria;c__Alphaproteobacteria;o__Rhodospirillales;f__Acetobacteraceae;g__	0	0	0	0	0	0	0	0
k__Bacteria;p__Proteobacteria;c__Alphaproteobacteria;o__Rhodospirillales;f__Acetobacteraceae;g__Craurococcus	0	0	0	0	0	0.000227337	0	0
k__Bacteria;p__Proteobacteria;c__Alphaproteobacteria;o__Rhodospirillales;f__Acetobacteraceae;g__Roseomonas	0.000284172	0	0	0	0	0.000113669	0	0
k__Bacteria;p__Proteobacteria;c__Alphaproteobacteria;o__Rhodospirillales;f__Rhodospirillaceae;Other	0	0	0	0	0	5.68343e-05	0	0
k__Bacteria;p__Proteobacteria;c__Alphaproteobacteria;o__Rhodospirillales;f__Rhodospirillaceae;g__	0	0	0	0	0	0	0	0
k__Bacteria;p__Proteobacteria;c__Alphaproteobacteria;o__Rhodospirillales;f__Rhodospirillaceae;g__Inquilinus	0	0	0	0	0	0	0	0
k__Bacteria;p__Proteobacteria;c__Alphaproteobacteria;o__Rickettsiales;Other;Other	0	0	0	0	0	0	0	5.68343e-05
k__Bacteria;p__Proteobacteria;c__Alphaproteobacteria;o__Rickettsiales;f__;g__	0	0	0	0	0	0	0	0
k__Bacteria;p__Proteobacteria;c__Alphaproteobacteria;o__Rickettsiales;f__Pelagibacteraceae;g__	0	0.000113669	0.000113669	0.000227337	5.68343e-05	0.000113669	0	0.000170503
k__Bacteria;p__Proteobacteria;c__Alphaproteobacteria;o__Rickettsiales;f__Rickettsiaceae;g__	5.68343e-05	0	0	0	0	0.000738846	0	0
k__Bacteria;p__Proteobacteria;c__Alphaproteobacteria;o__Rickettsiales;f__Rickettsiaceae;g__Rickettsia	0	0	0	0	0	5.68343e-05	0	0
k__Bacteria;p__Proteobacteria;c__Alphaproteobacteria;o__Rickettsiales;f__Rickettsiaceae;g__Wolbachia	0	0	5.68343e-05	0	0	0	0	0
k__Bacteria;p__Proteobacteria;c__Alphaproteobacteria;o__Rickettsiales;f__mitochondria;Other	0	5.68343e-05	5.68343e-05	5.68343e-05	0.00352373	0.00341006	0.00113669	0.00539926
k__Bacteria;p__Proteobacteria;c__Alphaproteobacteria;o__Rickettsiales;f__mitochondria;g__	5.68343e-05	0	5.68343e-05	0	5.68343e-05	0.000284172	0	0
k__Bacteria;p__Proteobacteria;c__Alphaproteobacteria;o__Rickettsiales;f__mitochondria;g__Lupinus	0	0	0	0	0	0	0	0
k__Bacteria;p__Proteobacteria;c__Alphaproteobacteria;o__Sphingomonadales;f__Erythrobacteraceae;g__	0	0	0	0	0	0	5.68343e-05	0
k__Bacteria;p__Proteobacteria;c__Alphaproteobacteria;o__Sphingomonadales;f__Erythrobacteraceae;g__Erythrobacter	0	0	0	0	0	0.000170503	0	5.68343e-05
k__Bacteria;p__Proteobacteria;c__Alphaproteobacteria;o__Sphingomonadales;f__Erythrobacteraceae;g__Lutibacterium	0	0	0	0	0	0	0	0
k__Bacteria;p__Proteobacteria;c__Alphaproteobacteria;o__Sphingomonadales;f__Sphingomonadaceae;Other	0	0	0	5.68343e-05	0	0	0	0
k__Bacteria;p__Proteobacteria;c__Alphaproteobacteria;o__Sphingomonadales;f__Sphingomonadaceae;g__	0.000170503	0	0	0	0	0.000113669	5.68343e-05	0
k__Bacteria;p__Proteobacteria;c__Alphaproteobacteria;o__Sphingomonadales;f__Sphingomonadaceae;g__Blastomonas	0	0	0	0	0	0.000113669	0	0
k__Bacteria;p__Proteobacteria;c__Alphaproteobacteria;o__Sphingomonadales;f__Sphingomonadaceae;g__Novosphingobium	0.000227337	0	0	0	0	5.68343e-05	0	0.000113669
k__Bacteria;p__Proteobacteria;c__Alphaproteobacteria;o__Sphingomonadales;f__Sphingomonadaceae;g__Sandaracinobacter	0	0	0	0	0	5.68343e-05	0	0
k__Bacteria;p__Proteobacteria;c__Alphaproteobacteria;o__Sphingomonadales;f__Sphingomonadaceae;g__Sphingobium	0	0	0	5.68343e-05	0.000113669	0.00170503	0	0
k__Bacteria;p__Proteobacteria;c__Alphaproteobacteria;o__Sphingomonadales;f__Sphingomonadaceae;g__Sphingomonas	0.000568343	0	0	0	0.000227337	0.00119352	0	0.000113669
k__Bacteria;p__Proteobacteria;c__Alphaproteobacteria;o__Sphingomonadales;f__Sphingomonadaceae;g__Sphingopyxis	0.000113669	0	0	0	0	0	0	0
k__Bacteria;p__Proteobacteria;c__Betaproteobacteria;Other;Other;Other	0.000113669	0	5.68343e-05	0.000113669	0	0.000113669	0	0
k__Bacteria;p__Proteobacteria;c__Betaproteobacteria;o__Burkholderiales;Other;Other	5.68343e-05	5.68343e-05	0	0	0	5.68343e-05	0	0
k__Bacteria;p__Proteobacteria;c__Betaproteobacteria;o__Burkholderiales;f__;g__	0	0	0	0	0	0.000341006	0	0
k__Bacteria;p__Proteobacteria;c__Betaproteobacteria;o__Burkholderiales;f__Alcaligenaceae;g__Achromobacter	5.68343e-05	0	0	0	0	0	5.68343e-05	5.68343e-05
k__Bacteria;p__Proteobacteria;c__Betaproteobacteria;o__Burkholderiales;f__Alcaligenaceae;g__Kerstersia	0	0	0	0	0	0	0	5.68343e-05
k__Bacteria;p__Proteobacteria;c__Betaproteobacteria;o__Burkholderiales;f__Alcaligenaceae;g__Sutterella	0	0	0	0	0	5.68343e-05	0	0
k__Bacteria;p__Proteobacteria;c__Betaproteobacteria;o__Burkholderiales;f__Burkholderiaceae;g__Burkholderia	0	0	0	0	0	0	0	0
k__Bacteria;p__Proteobacteria;c__Betaproteobacteria;o__Burkholderiales;f__Comamonadaceae;Other	0.000341006	0	0.000113669	0	0.000170503	0.00295539	0.000454675	0.000284172
k__Bacteria;p__Proteobacteria;c__Betaproteobacteria;o__Burkholderiales;f__Comamonadaceae;g__	0	0	0	0	0	5.68343e-05	0	0
k__Bacteria;p__Proteobacteria;c__Betaproteobacteria;o__Burkholderiales;f__Comamonadaceae;g__Acidovorax	0	0	0	0	0	5.68343e-05	0	0
k__Bacteria;p__Proteobacteria;c__Betaproteobacteria;o__Burkholderiales;f__Comamonadaceae;g__Aquabacterium	0.000341006	0	5.68343e-05	5.68343e-05	0.000113669	0.00147769	0.000227337	0.000170503
k__Bacteria;p__Proteobacteria;c__Betaproteobacteria;o__Burkholderiales;f__Comamonadaceae;g__Comamonas	0	5.68343e-05	0	0	0.000341006	0.00125036	0.00039784	0.000454675
k__Bacteria;p__Proteobacteria;c__Betaproteobacteria;o__Burkholderiales;f__Comamonadaceae;g__Delftia	0.00107985	0	0.000909349	0	0.00170503	0.020233	0.00159136	0.00130719
k__Bacteria;p__Proteobacteria;c__Betaproteobacteria;o__Burkholderiales;f__Comamonadaceae;g__Diaphorobacter	0	0	0	0	0	0	5.68343e-05	0
k__Bacteria;p__Proteobacteria;c__Betaproteobacteria;o__Burkholderiales;f__Comamonadaceae;g__Leptothrix	0.00107985	0.000113669	0.000511509	5.68343e-05	0.000852515	0.00346689	0.000341006	0.000227337
k__Bacteria;p__Proteobacteria;c__Betaproteobacteria;o__Burkholderiales;f__Comamonadaceae;g__Limnohabitans	0	0	0	0	0	5.68343e-05	0	0
k__Bacteria;p__Proteobacteria;c__Betaproteobacteria;o__Burkholderiales;f__Comamonadaceae;g__Mitsuaria	0	0	5.68343e-05	0	0	0	0	0
k__Bacteria;p__Proteobacteria;c__Betaproteobacteria;o__Burkholderiales;f__Comamonadaceae;g__Paucibacter	0	0	0	0	0	0	0	0
k__Bacteria;p__Proteobacteria;c__Betaproteobacteria;o__Burkholderiales;f__Comamonadaceae;g__RS62	0.000170503	5.68343e-05	0.000113669	0.000284172	5.68343e-05	0.000170503	0.000113669	0.000227337
k__Bacteria;p__Proteobacteria;c__Betaproteobacteria;o__Burkholderiales;f__Comamonadaceae;g__Rhodoferax	0	0	0	0	0	0	0	0
k__Bacteria;p__Proteobacteria;c__Betaproteobacteria;o__Burkholderiales;f__Comamonadaceae;g__Roseateles	0.000113669	0	0	0	0	0.000227337	5.68343e-05	0
k__Bacteria;p__Proteobacteria;c__Betaproteobacteria;o__Burkholderiales;f__Comamonadaceae;g__Rubrivivax	5.68343e-05	0	5.68343e-05	0	0	0.000113669	0	0
k__Bacteria;p__Proteobacteria;c__Betaproteobacteria;o__Burkholderiales;f__Comamonadaceae;g__Tepidimonas	0	0	0	0	0	0	0	0
k__Bacteria;p__Proteobacteria;c__Betaproteobacteria;o__Burkholderiales;f__Oxalobacteraceae;Other	0.000795681	0	5.68343e-05	0	0	0.00130719	0.000170503	0
k__Bacteria;p__Proteobacteria;c__Betaproteobacteria;o__Burkholderiales;f__Oxalobacteraceae;g__Cupriavidus	0	0	0	0	0	0.000170503	0.000170503	0
k__Bacteria;p__Proteobacteria;c__Betaproteobacteria;o__Burkholderiales;f__Oxalobacteraceae;g__Herbaspirillum	0	0	0	0	0	5.68343e-05	0	0
k__Bacteria;p__Proteobacteria;c__Betaproteobacteria;o__Burkholderiales;f__Oxalobacteraceae;g__Janthinobacterium	0	0	5.68343e-05	0	0	0	0	0
k__Bacteria;p__Proteobacteria;c__Betaproteobacteria;o__Burkholderiales;f__Oxalobacteraceae;g__Massilia	0	0	0	0	0	5.68343e-05	0	0
k__Bacteria;p__Proteobacteria;c__Betaproteobacteria;o__Burkholderiales;f__Oxalobacteraceae;g__Oxalobacter	0	0	5.68343e-05	0	0	0	0	0
k__Bacteria;p__Proteobacteria;c__Betaproteobacteria;o__Burkholderiales;f__Oxalobacteraceae;g__Ralstonia	0.000227337	0	0	0	5.68343e-05	0.000511509	5.68343e-05	0
k__Bacteria;p__Proteobacteria;c__Betaproteobacteria;o__MWH-UniP1;f__;g__	0	0	0	0	0	0	0	0
k__Bacteria;p__Proteobacteria;c__Betaproteobacteria;o__Methylophilales;f__Methylophilaceae;g__	0.000227337	0	0.000113669	0.000227337	0	0.000284172	0.000170503	0.000170503
k__Bacteria;p__Proteobacteria;c__Betaproteobacteria;o__Methylophilales;f__Methylophilaceae;g__Methylobacillus	0	0	0	0	0	0.000170503	0	0
k__Bacteria;p__Proteobacteria;c__Betaproteobacteria;o__Neisseriales;f__Neisseriaceae;Other	0	0	0	0	0	5.68343e-05	0	0
k__Bacteria;p__Proteobacteria;c__Betaproteobacteria;o__Neisseriales;f__Neisseriaceae;g__	0.000170503	0	0	0	5.68343e-05	0.000170503	0	0
k__Bacteria;p__Proteobacteria;c__Betaproteobacteria;o__Neisseriales;f__Neisseriaceae;g__Aquitalea	0	0	0	0	0	0	0	0
k__Bacteria;p__Proteobacteria;c__Betaproteobacteria;o__Neisseriales;f__Neisseriaceae;g__Kingella	5.68343e-05	0	0	0	0	0	0	0
k__Bacteria;p__Proteobacteria;c__Betaproteobacteria;o__Neisseriales;f__Neisseriaceae;g__Neisseria	0	0	0	0	0.000170503	0.000795681	0	5.68343e-05
k__Bacteria;p__Proteobacteria;c__Betaproteobacteria;o__Neisseriales;f__Neisseriaceae;g__Vitreoscilla	0	0	0	0	0	0.000113669	0	0.000170503
k__Bacteria;p__Proteobacteria;c__Betaproteobacteria;o__Nitrosomonadales;f__;g__	0	0	0	0	0	0	0	0
k__Bacteria;p__Proteobacteria;c__Betaproteobacteria;o__Nitrosomonadales;f__Nitrosomonadaceae;g__	0	0	0	0	0	0	0	0
k__Bacteria;p__Proteobacteria;c__Betaproteobacteria;o__Procabacteriales;f__Procabacteriaceae;g__	0	0	0	0	0	0	0	0
k__Bacteria;p__Proteobacteria;c__Betaproteobacteria;o__Rhodocyclales;f__Rhodocyclaceae;Other	0	0	0	0	0	0	0	0
k__Bacteria;p__Proteobacteria;c__Betaproteobacteria;o__Rhodocyclales;f__Rhodocyclaceae;g__	0	0	0	0	0	0.000113669	0	0
k__Bacteria;p__Proteobacteria;c__Betaproteobacteria;o__Rhodocyclales;f__Rhodocyclaceae;g__Dechloromonas	0	0	0	0	0.000113669	0.000568343	0	5.68343e-05
k__Bacteria;p__Proteobacteria;c__Betaproteobacteria;o__Rhodocyclales;f__Rhodocyclaceae;g__Zoogloea	5.68343e-05	0	0	0	0	0	0	0
k__Bacteria;p__Proteobacteria;c__Betaproteobacteria;o__SBla14;f__;g__	0	0	0	0	0	0	0	0
k__Bacteria;p__Proteobacteria;c__Betaproteobacteria;o__SC-I-84;f__;g__	0	0	0	0	0	0.000170503	0	0
k__Bacteria;p__Proteobacteria;c__Deltaproteobacteria;Other;Other;Other	0	0	0	0	0	0.000113669	0	0
k__Bacteria;p__Proteobacteria;c__Deltaproteobacteria;o__;f__;g__	0	0	0.000113669	0	0	0	0	0
k__Bacteria;p__Proteobacteria;c__Deltaproteobacteria;o__Bdellovibrionales;f__Bacteriovoracaceae;g__	0	0	0	0	0	0	0	5.68343e-05
k__Bacteria;p__Proteobacteria;c__Deltaproteobacteria;o__Bdellovibrionales;f__Bacteriovoracaceae;g__Bacteriovorax	0	0	5.68343e-05	0	0	0	0	0
k__Bacteria;p__Proteobacteria;c__Deltaproteobacteria;o__Desulfarculales;f__Desulfarculaceae;g__	0	0	0	0	0	0	0	0
k__Bacteria;p__Proteobacteria;c__Deltaproteobacteria;o__Desulfobacterales;f__Desulfobacteraceae;Other	0	0	0	0	0	0.000113669	0	0
k__Bacteria;p__Proteobacteria;c__Deltaproteobacteria;o__Desulfobacterales;f__Desulfobacteraceae;g__Desulfococcus	0	0	0	0	0	0.00113669	0	0
k__Bacteria;p__Proteobacteria;c__Deltaproteobacteria;o__Desulfobacterales;f__Desulfobacteraceae;g__Desulfosarcina	0	0	5.68343e-05	0	0	0	0	0
k__Bacteria;p__Proteobacteria;c__Deltaproteobacteria;o__Desulfobacterales;f__Desulfobulbaceae;Other	0	0	0	0	0	0	0	0
k__Bacteria;p__Proteobacteria;c__Deltaproteobacteria;o__Desulfobacterales;f__Desulfobulbaceae;g__	0	0	0.000113669	0	0	0.000795681	0	0
k__Bacteria;p__Proteobacteria;c__Deltaproteobacteria;o__Desulfobacterales;f__Desulfobulbaceae;g__Desulfobulbus	0	0	0	0	0	0.000341006	5.68343e-05	0
k__Bacteria;p__Proteobacteria;c__Deltaproteobacteria;o__Desulfobacterales;f__Desulfobulbaceae;g__Desulfotalea	0	0	0	0	0	0	0	0
k__Bacteria;p__Proteobacteria;c__Deltaproteobacteria;o__Desulfobacterales;f__Nitrospinaceae;g__Nitrospina	0	0	0	0	0	0	0	0
k__Bacteria;p__Proteobacteria;c__Deltaproteobacteria;o__Desulfovibrionales;f__Desulfovibrionaceae;g__Desulfovibrio	0	0	0	0	0.000284172	0	0	0
k__Bacteria;p__Proteobacteria;c__Deltaproteobacteria;o__Desulfuromonadales;Other;Other	0	0	0	0	0	0	0	0
k__Bacteria;p__Proteobacteria;c__Deltaproteobacteria;o__FAC87;f__;g__	0	5.68343e-05	0	0	0	0	0	0
k__Bacteria;p__Proteobacteria;c__Deltaproteobacteria;o__MIZ46;f__;g__	0	0	0	0	0	0	0	5.68343e-05
k__Bacteria;p__Proteobacteria;c__Deltaproteobacteria;o__Myxococcales;Other;Other	0	0	0	0	0	0	0	5.68343e-05
k__Bacteria;p__Proteobacteria;c__Deltaproteobacteria;o__Myxococcales;f__;g__	0	0	0	0	0	0.000284172	0	0
k__Bacteria;p__Proteobacteria;c__Deltaproteobacteria;o__Myxococcales;f__Cystobacteraceae;g__	0	0	0	0	0	0	0	0
k__Bacteria;p__Proteobacteria;c__Deltaproteobacteria;o__Myxococcales;f__Cystobacteraceae;g__Cystobacter	0	0	0	0	0	0	0	0
k__Bacteria;p__Proteobacteria;c__Deltaproteobacteria;o__Myxococcales;f__Cystobacterineae;g__	0	0	0	0	0	0	0	0
k__Bacteria;p__Proteobacteria;c__Deltaproteobacteria;o__Myxococcales;f__Haliangiaceae;g__	0	0	0	0	0	5.68343e-05	0	0
k__Bacteria;p__Proteobacteria;c__Deltaproteobacteria;o__Myxococcales;f__OM27;g__	0	0	0	0	0	0	0	0
k__Bacteria;p__Proteobacteria;c__Deltaproteobacteria;o__PB19;f__;g__	0	5.68343e-05	0	0	0	0	0	0
k__Bacteria;p__Proteobacteria;c__Deltaproteobacteria;o__Spirobacillales;f__;g__	0	0	0	0	0	0	0	0
k__Bacteria;p__Proteobacteria;c__Deltaproteobacteria;o__Syntrophobacterales;f__Syntrophobacteraceae;g__	0	0	0	0	0	0	0	0
k__Bacteria;p__Proteobacteria;c__Epsilonproteobacteria;o__Campylobacterales;f__Campylobacteraceae;g__Arcobacter	5.68343e-05	0	0	0	0	0.000113669	0	0
k__Bacteria;p__Proteobacteria;c__Epsilonproteobacteria;o__Campylobacterales;f__Campylobacteraceae;g__Campylobacter	0	0	0	0	0.000795681	0	5.68343e-05	0
k__Bacteria;p__Proteobacteria;c__Epsilonproteobacteria;o__Campylobacterales;f__Helicobacteraceae;Other	0	0	0	0	0	0	0.000284172	0.000795681
k__Bacteria;p__Proteobacteria;c__Epsilonproteobacteria;o__Campylobacterales;f__Helicobacteraceae;g__Flexispira	0	0	0	0	0	5.68343e-05	5.68343e-05	0.00039784
k__Bacteria;p__Proteobacteria;c__Epsilonproteobacteria;o__Campylobacterales;f__Helicobacteraceae;g__Helicobacter	0	0	0	0	0.00159136	0.000170503	0.040807	0.202785
k__Bacteria;p__Proteobacteria;c__Gammaproteobacteria;Other;Other;Other	0	0	0	0	0	0.000341006	5.68343e-05	0
k__Bacteria;p__Proteobacteria;c__Gammaproteobacteria;o__;f__;g__	0	0	0	0	0	0	0	0
k__Bacteria;p__Proteobacteria;c__Gammaproteobacteria;o__Aeromonadales;f__Aeromonadaceae;g__	0	0	0	0	0	0.000113669	0	5.68343e-05
k__Bacteria;p__Proteobacteria;c__Gammaproteobacteria;o__Aeromonadales;f__Aeromonadaceae;g__Aeromonas	0	0	0	0	0	0	0	0
k__Bacteria;p__Proteobacteria;c__Gammaproteobacteria;o__Alteromonadales;f__;g__	0	0	0	0	0	5.68343e-05	0	5.68343e-05
k__Bacteria;p__Proteobacteria;c__Gammaproteobacteria;o__Alteromonadales;f__Alteromonadaceae;g__HTCC2207	0	0	0	0	0	0	0	0
k__Bacteria;p__Proteobacteria;c__Gammaproteobacteria;o__Alteromonadales;f__Alteromonadaceae;g__Microbulbifer	0	0	0	0	0	0.000170503	0	0
k__Bacteria;p__Proteobacteria;c__Gammaproteobacteria;o__Alteromonadales;f__Alteromonadaceae;g__nsmpVI18	0	0	0	0	5.68343e-05	0	0	0
k__Bacteria;p__Proteobacteria;c__Gammaproteobacteria;o__Alteromonadales;f__Idiomarinaceae;g__Pseudidiomarina	0	0	0	0	0.000113669	0	0	0
k__Bacteria;p__Proteobacteria;c__Gammaproteobacteria;o__Alteromonadales;f__OM60;Other	0	0	5.68343e-05	0	0	0	0	0
k__Bacteria;p__Proteobacteria;c__Gammaproteobacteria;o__Alteromonadales;f__OM60;g__	0	0	0	5.68343e-05	0	0.000113669	0	5.68343e-05
k__Bacteria;p__Proteobacteria;c__Gammaproteobacteria;o__Chromatiales;Other;Other	0	0	0	0	0	5.68343e-05	0	0
k__Bacteria;p__Proteobacteria;c__Gammaproteobacteria;o__Chromatiales;f__;g__	0	0	0	0	0	0.000568343	5.68343e-05	0
k__Bacteria;p__Proteobacteria;c__Gammaproteobacteria;o__Chromatiales;f__Ectothiorhodospiraceae;g__	0	0	0	0	0	0	0	0
k__Bacteria;p__Proteobacteria;c__Gammaproteobacteria;o__Enterobacteriales;f__Enterobacteriaceae;Other	0	0	0	0	0	5.68343e-05	0	5.68343e-05
k__Bacteria;p__Proteobacteria;c__Gammaproteobacteria;o__Enterobacteriales;f__Enterobacteriaceae;g__Escherichia	0	0	0	0	0	0.00403524	0	5.68343e-05
k__Bacteria;p__Proteobacteria;c__Gammaproteobacteria;o__Enterobacteriales;f__Enterobacteriaceae;g__Pantoea	0	0	0	0	0	0	0	0
k__Bacteria;p__Proteobacteria;c__Gammaproteobacteria;o__Enterobacteriales;f__Enterobacteriaceae;g__Shigella	0	0	0	0	0	5.68343e-05	0	0
k__Bacteria;p__Proteobacteria;c__Gammaproteobacteria;o__Legionellales;Other;Other	0	0	0	0	0	0	5.68343e-05	0
k__Bacteria;p__Proteobacteria;c__Gammaproteobacteria;o__Legionellales;f__;g__	0	0	0	0	0	0	0	0
k__Bacteria;p__Proteobacteria;c__Gammaproteobacteria;o__Legionellales;f__Coxiellaceae;g__	0	0	0	0	0	0.000227337	0	0
k__Bacteria;p__Proteobacteria;c__Gammaproteobacteria;o__Legionellales;f__Coxiellaceae;g__Aquicella	0	0	0	0	5.68343e-05	0	0	0
k__Bacteria;p__Proteobacteria;c__Gammaproteobacteria;o__Legionellales;f__Legionellaceae;Other	0	0	0	0	0	0	0	0
k__Bacteria;p__Proteobacteria;c__Gammaproteobacteria;o__Legionellales;f__Legionellaceae;g__	0	0	0	0	0	0	0	0
k__Bacteria;p__Proteobacteria;c__Gammaproteobacteria;o__Legionellales;f__Legionellaceae;g__Legionella	0	5.68343e-05	0	0	0	0	0	0
k__Bacteria;p__Proteobacteria;c__Gammaproteobacteria;o__Oceanospirillales;Other;Other	0	0	0	0	0	0	0	0
k__Bacteria;p__Proteobacteria;c__Gammaproteobacteria;o__Oceanospirillales;f__;g__	0	0	0	0	0	5.68343e-05	0	0
k__Bacteria;p__Proteobacteria;c__Gammaproteobacteria;o__Oceanospirillales;f__Halomonadaceae;g__Haererehalobacter	0	0	0	0	0	0	0	0
k__Bacteria;p__Proteobacteria;c__Gammaproteobacteria;o__Oceanospirillales;f__Halomonadaceae;g__Halomonas	0	0	0	0	0	0	0	0
k__Bacteria;p__Proteobacteria;c__Gammaproteobacteria;o__Pasteurellales;f__Pasteurellaceae;g__Gallibacterium	0	0	0	0	0	0.000113669	0	0.000227337
k__Bacteria;p__Proteobacteria;c__Gammaproteobacteria;o__Pseudomonadales;f__Moraxellaceae;g__Acinetobacter	0.00125036	0.000738846	0.000795681	0.000341006	0.00949133	0.00210287	0.00130719	0.000511509
k__Bacteria;p__Proteobacteria;c__Gammaproteobacteria;o__Pseudomonadales;f__Moraxellaceae;g__Alkanindiges	0	0	0	0	0	5.68343e-05	0	0
k__Bacteria;p__Proteobacteria;c__Gammaproteobacteria;o__Pseudomonadales;f__Moraxellaceae;g__Enhydrobacter	0	0	0	0	0.000284172	0.000511509	0.000113669	0
k__Bacteria;p__Proteobacteria;c__Gammaproteobacteria;o__Pseudomonadales;f__Pseudomonadaceae;Other	0	0	0	0	0	0	0	0
k__Bacteria;p__Proteobacteria;c__Gammaproteobacteria;o__Pseudomonadales;f__Pseudomonadaceae;g__Pseudomonas	0.000284172	0	0	0	5.68343e-05	0.000284172	0	0
k__Bacteria;p__Proteobacteria;c__Gammaproteobacteria;o__Thiohalorhabdales;f__;g__	0	0	0	0	0	0	0	0
k__Bacteria;p__Proteobacteria;c__Gammaproteobacteria;o__Thiotrichales;f__Piscirickettsiaceae;Other	0	0	0	0	0	5.68343e-05	0	0
k__Bacteria;p__Proteobacteria;c__Gammaproteobacteria;o__Thiotrichales;f__Piscirickettsiaceae;g__	5.68343e-05	0	5.68343e-05	0.000113669	5.68343e-05	0.00267121	0.000227337	5.68343e-05
k__Bacteria;p__Proteobacteria;c__Gammaproteobacteria;o__Vibrionales;f__Pseudoalteromonadaceae;g__Pseudoalteromonas	0	0	0	0	0	0	0	5.68343e-05
k__Bacteria;p__Proteobacteria;c__Gammaproteobacteria;o__Xanthomonadales;f__Sinobacteraceae;g__	0	0	0	0	0	0	0	0
k__Bacteria;p__Proteobacteria;c__Gammaproteobacteria;o__Xanthomonadales;f__Xanthomonadaceae;Other	0.000113669	0	0	0	0	0.000113669	0	5.68343e-05
k__Bacteria;p__Proteobacteria;c__Gammaproteobacteria;o__Xanthomonadales;f__Xanthomonadaceae;g__Luteimonas	0	0	0	0	5.68343e-05	5.68343e-05	0	0
k__Bacteria;p__Proteobacteria;c__Gammaproteobacteria;o__Xanthomonadales;f__Xanthomonadaceae;g__Lysobacter	5.68343e-05	0	0	0	0	0	0	5.68343e-05
k__Bacteria;p__Proteobacteria;c__Gammaproteobacteria;o__Xanthomonadales;f__Xanthomonadaceae;g__Stenotrophomonas	0.00119352	0.000170503	0	0	0.000625178	0.00443308	0.000909349	0.000795681
k__Bacteria;p__Proteobacteria;c__Gammaproteobacteria;o__Xanthomonadales;f__Xanthomonadaceae;g__Thermomonas	0	0	0	0	0	0.000113669	0	0
k__Bacteria;p__Proteobacteria;c__Gammaproteobacteria;o__Xanthomonadales;f__Xanthomonadaceae;g__Xanthomonas	0	0	0	0	0	5.68343e-05	0	0
k__Bacteria;p__Proteobacteria;c__Gammaproteobacteria;o__[Marinicellales];f__[Marinicellaceae];g__	5.68343e-05	0	0.000113669	5.68343e-05	0.000170503	0.00301222	5.68343e-05	5.68343e-05
k__Bacteria;p__Proteobacteria;c__Gammaproteobacteria;o__[Marinicellales];f__[Marinicellaceae];g__Marinicella	0	0	0	0	0	0.00039784	0	0
k__Bacteria;p__SBR1093;c__VHS-B5-50;o__;f__;g__	0.000113669	5.68343e-05	0.000113669	0	5.68343e-05	0.00153453	0.000113669	0
k__Bacteria;p__Spirochaetes;c__Spirochaetes;o__Sphaerochaetales;f__Sphaerochaetaceae;Other	0	0	0	0	0	0	0	0
k__Bacteria;p__Spirochaetes;c__Spirochaetes;o__Sphaerochaetales;f__Sphaerochaetaceae;g__Sphaerochaeta	0	0	0	0	0.000284172	5.68343e-05	0	0
k__Bacteria;p__Spirochaetes;c__Spirochaetes;o__Sphaerochaetales;f__Sphaerochaetaceae;g__wall-less	0	0	0	0	0	0	0	0
k__Bacteria;p__Spirochaetes;c__Spirochaetes;o__Spirochaetales;f__Spirochaetaceae;Other	0	0	0	0	5.68343e-05	0	0	0
k__Bacteria;p__Spirochaetes;c__Spirochaetes;o__Spirochaetales;f__Spirochaetaceae;g__Spirochaeta	0	0	5.68343e-05	0	0.000113669	0	0	0
k__Bacteria;p__Spirochaetes;c__Spirochaetes;o__Spirochaetales;f__Spirochaetaceae;g__Treponema	0	5.68343e-05	0	0	0	0	0	0
k__Bacteria;p__Spirochaetes;c__[Leptospirae];o__[Leptospirales];f__Leptospiraceae;g__Turneriella	0	0	0	0	0	0	0	0
k__Bacteria;p__Synergistetes;c__Synergistia;o__Synergistales;Other;Other	0	0	0	0	0	0	0	0
k__Bacteria;p__Synergistetes;c__Synergistia;o__Synergistales;f__Dethiosulfovibrionaceae;g__	0	0	0	0	0	0	0	0
k__Bacteria;p__Synergistetes;c__Synergistia;o__Synergistales;f__Synergistaceae;Other	0.000170503	0	0.000170503	0	0	0	5.68343e-05	0.000170503
k__Bacteria;p__Synergistetes;c__Synergistia;o__Synergistales;f__Synergistaceae;g__	0.000113669	0	0	0	0	0	0.000113669	0
k__Bacteria;p__Synergistetes;c__Synergistia;o__Synergistales;f__Synergistaceae;g__Synergistes	0	0.000113669	5.68343e-05	0	0	0	0	0
k__Bacteria;p__TM6;c__SBRH58;o__;f__;g__	0	0	0	0	0	0.000113669	0	0
k__Bacteria;p__TM6;c__SJA-4;o__;f__;g__	0	0	0	0	0	0.000341006	0	0
k__Bacteria;p__TM7;c__TM7-1;o__;f__;g__	0	0	5.68343e-05	0	0	0	0	0
k__Bacteria;p__Tenericutes;c__Mollicutes;Other;Other;Other	0	0	0	0	0	0	0	5.68343e-05
k__Bacteria;p__Tenericutes;c__Mollicutes;o__;f__;g__	0	5.68343e-05	0	5.68343e-05	5.68343e-05	0	5.68343e-05	5.68343e-05
k__Bacteria;p__Tenericutes;c__Mollicutes;o__Acholeplasmatales;f__Acholeplasmataceae;g__Acholeplasma	0	0	0	0	0	0	0	0
k__Bacteria;p__Tenericutes;c__Mollicutes;o__Mycoplasmatales;f__Mycoplasmataceae;Other	0	0	0	0	0	0	5.68343e-05	0
k__Bacteria;p__Tenericutes;c__Mollicutes;o__Mycoplasmatales;f__Mycoplasmataceae;g__	0	0	0	0	5.68343e-05	0	0.00221654	0
k__Bacteria;p__Tenericutes;c__Mollicutes;o__Mycoplasmatales;f__Mycoplasmataceae;g__Mycoplasma	0	0	0	0	0	0	0	0
k__Bacteria;p__Tenericutes;c__Mollicutes;o__RF39;f__;g__	0.000341006	0.000113669	0.000284172	0	5.68343e-05	0	5.68343e-05	5.68343e-05
k__Bacteria;p__Verrucomicrobia;Other;Other;Other;Other	0	0	0	0	0	0	0	5.68343e-05
k__Bacteria;p__Verrucomicrobia;c__Opitutae;Other;Other;Other	0	0	0	0	0	0	0	0
k__Bacteria;p__Verrucomicrobia;c__Opitutae;o__Opitutales;f__Opitutaceae;g__Opitutus	0	0	0	0	0	0.000113669	0	0
k__Bacteria;p__Verrucomicrobia;c__Opitutae;o__Puniceicoccales;f__Puniceicoccaceae;g__Coraliomargarita	0	5.68343e-05	5.68343e-05	0	0	5.68343e-05	5.68343e-05	0
k__Bacteria;p__Verrucomicrobia;c__Verrucomicrobiae;o__Verrucomicrobiales;f__Verrucomicrobiaceae;g__Akkermansia	0	0.000227337	0.000113669	0	0	0	5.68343e-05	0.000227337
k__Bacteria;p__WPS-2;c__;o__;f__;g__	0	5.68343e-05	0	0	0	0	0	0
k__Bacteria;p__WS2;c__SHA-109;o__;f__;g__	0	0	0	0	0	5.68343e-05	0	0
k__Bacteria;p__WS3;c__PRR-12;o__GN03;f__KSB4;g__	0	0	0	0	0	0	0	0
k__Bacteria;p__WS3;c__PRR-12;o__Sediment-1;f__;g__	0	0	0	0	0	0.000113669	0	0
k__Bacteria;p__[Thermi];c__Deinococci;o__Deinococcales;f__Deinococcaceae;g__Deinococcus	0.000113669	0	5.68343e-05	0	0.000511509	0.000795681	0	0.000113669
k__Bacteria;p__[Thermi];c__Deinococci;o__Deinococcales;f__Trueperaceae;g__B-42	0	0	0	0	0	5.68343e-05	0	0
k__Bacteria;p__[Thermi];c__Deinococci;o__Deinococcales;f__Trueperaceae;g__Truepera	0	0	0	0	0	0	0	5.68343e-05
k__Bacteria;p__[Thermi];c__Deinococci;o__Thermales;f__Thermaceae;g__Thermus	0	0	0	0	5.68343e-05	0	0	0
